1 **Modulated TRPC1 expression predicts sensitivity of breast cancer to**  
2 **doxorubicin and magnetic field therapy: segue towards a precision medicine**  
3 **approach.**

4 Yee Kit Tai<sup>1,2</sup>, Karen Ka Wing Chan<sup>1,2</sup>, Charlene Hui Hua Fong<sup>1,2</sup>, Sharanya  
5 Ramanan<sup>1,2</sup>, Jasmine Lye Yee Yap<sup>1,2</sup>, Jocelyn Naixin Yin<sup>1,2</sup>, Yun Sheng Yip<sup>3</sup>, Wei Ren  
6 Tan<sup>3</sup>, Angele Pei Fern Koh<sup>4</sup>, Nguan Soon Tan<sup>3,5</sup>, Ching Wan Chan<sup>6,7</sup>, Ruby Yun Ju  
7 Huang<sup>4,8</sup>, Alfredo Franco-Obregón<sup>1,2,9,10,11,12</sup>

8

9 <sup>1</sup>Department of Surgery, Yong Loo Lin School of Medicine, National University of  
10 Singapore, Singapore

11 <sup>2</sup>Biologic Currents Electromagnetic Pulsing Systems Laboratory, BICEPS, National  
12 University of Singapore

13 <sup>3</sup>Lee Kong Chian School of Medicine, Nanyang Technological University Singapore,  
14 Singapore

15 <sup>4</sup>Cancer Science Institute of Singapore, National University of Singapore, Singapore

16 <sup>5</sup>School of Biological Sciences, Nanyang Technological University Singapore,  
17 Singapore

18 <sup>6</sup>Division of General Surgery (Breast Surgery), Department of Surgery, National  
19 University Hospital

20 <sup>7</sup>Division of Surgical Oncology, National University Cancer Institute, Singapore

21 <sup>8</sup>Department of Obstetrics & Gynaecology, National University Health System,  
22 Singapore

23 <sup>9</sup>Institute for Health Innovation & Technology, iHealthtech, National University of  
24 Singapore, Singapore

25 <sup>10</sup>Competence Center for Applied Biotechnology and Molecular Medicine, University  
26 of Zürich, Zürich, Switzerland

27 <sup>11</sup>Department of Physiology, Yong Loo Lin School of Medicine, National University of  
28 Singapore, Singapore

29 <sup>12</sup>Healthy Longevity Translational Research Programme, Yong Loo Lin School of  
30 Medicine, National University of Singapore, Singapore

31

32 **Corresponding author:** Alfredo Franco-Obregón, Email: [suraf@nus.edu.sg](mailto:suraf@nus.edu.sg); Office:  
33 (+65) 6777 8427; Laboratory: (+65) 6601 6143. Address: Department of Surgery,  
34 Yong Loo Lin School of Medicine, National University of Singapore, NUHS Tower  
35 Block Level 8, 1E Kent Ridge Road, Singapore 119228.

36

### 37 **Abstract**

38 **Background:** Chemotherapy is the mainstream treatment modality for invasive breast  
39 cancer. Nonetheless, chemotherapy-associated adverse events can result in a patient  
40 terminating treatment. We show that transient receptor potential channel 1 (TRPC1)  
41 expression level predicts breast cancer sensitivity to doxorubicin (DOX) and pulsed  
42 electromagnetic field (PEMF) therapies.

43 **Methods:** The effects of PEMFs were examined with respect to: **1**) the growth of MCF-  
44 7 cells *in vitro*; **2**) MCF-7 tumors implanted into a chicken chorioallantoic membrane  
45 (CAM) model and; **3**) patient-derived and MCF-7 breast cancer xenografts in mice.

46 Potential synergisms between DOX and PEMF therapies were examined in these  
47 model systems and under conditions of TRPC1 overexpression or silencing *in vitro*.

48 **Results:** PEMF exposure impaired the survival of MCF-7 cells, but not that of  
49 nonmalignant MCF10A breast cells. The effects of PEMF- and DOX-therapies  
50 synergized *in vitro* at compromising MCF-7 cell growth. Synergism could be  
51 corroborated *in vivo* with patient-derived xenograft mouse models, wherein PEMF  
52 exposure alone or in combination with DOX reduced tumor size. Stable  
53 overexpression of TRPC1 enhanced the vulnerability of MCF-7 cells to both DOX and  
54 PEMF exposure and promoted proliferation, whereas chronic DOX exposure reduced  
55 TRPC1 expression, induced chemoresistance, precluded response to PEMF  
56 exposure and mitigated proliferation. Markers of metastasis including *SLUG*, *SNAIL*,  
57 *VIMENTIN*, and *E-CADHERIN* as well as invasiveness were also positively correlated  
58 with TRPC1 channel expression.

59 **Conclusion:** The presented data supports a potential role of PEMF-therapy as an  
60 effective companion therapy to DOX-based chemotherapy for the treatment of breast  
61 cancers characterized by elevated TRPC1 expression levels.

62

### 63 **Keywords**

64 breast cancer, oncology, PEMFs, EMT, patient-derived xenograft, chorioallantoic  
65 membrane, doxorubicin, TRPC1, chemotherapy

66

### 67 **Background**

68 Breast cancer is the leading cause of cancer-associated death for women worldwide  
69 (1). It is estimated that 1 in 8 women in the US will be diagnosed with invasive breast  
70 cancer within their lifetimes (2). And, although chemotherapy is the mainstream  
71 treatment modality for breast cancer, greater than 50% of women undertaking

72 chemotherapy will experience at least one chemotherapy-related adverse event (3).

73 An urgent need hence exists for companion therapies to improve chemotherapeutic

74 outcome in hopes of mitigating associated adverse events and reducing treatment-

75 related toxicities.

76 Doxorubicin (DOX) is the most widely used chemotherapeutic agent for breast

77 and other cancers (3). The anticancer effects of DOX are attributed to its ability to

78 inhibit DNA replication in actively-proliferating cancer cells (4) as well as to stimulate

79 reactive oxygen species (ROS) production via a mechanism of redox cycling, causing

80 oxidative damage to lipids, DNA, and proteins (3). The ensuing mitochondrial damage

81 further accentuates DOX-dependent ROS production to exacerbate oxidative damage

82 (4).

83 Brief exposure (10 min) to low amplitude (1 mT) pulsing magnetic fields (PEMFs)

84 has been shown capable of stimulating mitochondrial respiration and ROS production

85 (5), thereby promoting both *in vitro* (5) and *in vivo* (6) myogeneses via a process of

86 magnetic mitohormesis. Obeying a mitohormetic mechanism of operation (7), brief and

87 low amplitude PEMF exposure would produce low levels of ROS sufficient to instill

88 mitochondrial survival adaptations, whereas exaggerated PEMF exposure might be

89 expected to produce detrimental levels of oxidative stress that instead stymie cell

90 survival. Importantly, the threshold for achieving an irreversibly damaging level of

91 oxidative stress would depend on the basal metabolic rate and existing inflammatory

92 status of the recipient cells. Accordingly, exposure to 3 mT PEMFs for one hour was

93 previously shown to be cytotoxic to MCF-7 breast cancer cells, whereas the same

94 exposure paradigm was tolerated by MCF10A nonmalignant breast cells (8).

95           Transient Receptor Potential Channel 1 (TRPC1) expression is necessary and  
96 sufficient to bestow PEMF-stimulated mitochondrial respiration and proliferation (9).  
97 Evidence of a TRPC1-mitochondrial axis exists with the findings that calcium entry  
98 modulates mitochondrial respiration (10), whereas mitochondrial ROS reciprocally  
99 modulates TRPC1 function (11). TRPC1-mediated calcium was hence proposed as  
100 an exploitable point of vulnerability to undermine cancer viability (12, 13) by  
101 commandeering the calcium/ROS-dependent cytotoxicity pathway (14, 15). TRPC1  
102 and TRPM7 are the most abundantly expressed of all TRP channels (16),  
103 underscoring their well-documented physiological and clinical importance. Elevated  
104 expression levels of TRPC1, TRPC6, TRPM7, TRPM8, and TRPV6 are detected in  
105 human breast ductal adenocarcinoma (hBDA) cells (17), whereby the expressions of  
106 TRPC1, TRPM7, and TRPM8 were most closely correlated with proliferative  
107 deregulation and tumor growth, and TRPV6 was more strongly correlated in invasive  
108 breast cancers. On the other hand, in high histopathological grade breast cancers,  
109 TRPC1 expression was negatively correlated with invasiveness and chemoresistance  
110 (17). Conversely, DOX treatment has been shown to induce genotypic and phenotypic  
111 modifications that make cancer cells refractory to chemotherapy (18). While the  
112 chemotherapeutic agents, cisplatin and carboplatin, are capable of downregulating  
113 TRPC1 channel expression in ovarian cancer cell lines (19), the effect of DOX on  
114 TRPC1 channel expression in breast cancer is unexplored.

115           Given the reported capacity of PEMFs to target breast cancer cells (8), we  
116 hypothesized that DOX and PEMF treatments might synergize to undermine breast  
117 cancer growth. We provide relevant evidence *in vitro* and *in vivo* that combined DOX  
118 and PEMF treatments slow growth, augment apoptosis and enhance breast tumor  
119 resorption to a greater degree than either treatment alone. Evidence is also provided

120 that TRPC1 expression level predicts breast cancer vulnerability to DOX and PEMF  
121 treatments. Overexpression of TRPC1 increased MCF-7 vulnerability to DOX and  
122 PEMF exposure, whereas silencing TRPC1 expression abrogated sensitivity to  
123 PEMFs and DOX and could be recapitulated with prolonged DOX-exposure. TRPC1  
124 overexpression also increased MCF-7 cell proliferation and invasiveness, whereas  
125 TRPC1 downregulation suppressed proliferation, supporting a role for TRPC1 in  
126 tumorigenesis and providing a selective target for PEMF-intervention.

127

## 128 **Materials and methods**

129 Full materials and methods are made available in Supplementary Information.

130

### 131 **Chick Chorioallantoic Membrane (CAM) Model**

132 The chick chorioallantoic membrane (CAM) assay (20) was performed using fertilized  
133 Bovans Goldline Brown chicken eggs purchased from Chew's Egg Farm Pte Ltd.,  
134 Singapore. Briefly, eggs were placed horizontally in a 38.5°C humidified chamber of 70%  
135 humidity for 3 days. On day 3, 3 to 4 ml of albumin was removed through a hole in the  
136 apex of the eggs using an 18G needle on a 5 ml syringe to lower the CAM. An oval 1  
137 cm<sup>2</sup> hole was then made on the center of the eggs and covered using a 1624W  
138 Tegaderm semi-permeable membrane. On day 7, the eggs were inoculated with 1.5 x  
139 10<sup>6</sup> MCF-7 cells resuspended in 50 ul of Matrigel (Sigma Aldrich) on the blood vessel  
140 of the CAM. Prior to the inoculation of the MCF-7 cells, the blood vessels closer to the  
141 CAM were gently perforated using a dry glass rod. The eggs were resealed using  
142 Tegaderm and left for another 2 days. The eggs were then exposed to PEMF

143 stimulation on days 9, 10, and 11 for 1 h each day. Tumor weight was determined on  
144 Day 13.

145

## 146 **MCF-7 Breast Cancer Xenograft and Patient-Derived Xenograft (PDX) Model in** 147 **NSG mice**

148 NSG (NOD.Cg-Prkdc<sup>scid</sup> Il2rg<sup>tm1Wjl</sup>/SzJ) mice, which lack human-specific cytokines and  
149 human leukocyte antigen (HLA) expression on stromal cells were used to host the  
150 breast cancer cell lines or patient-derived xenografts (PDX) (21). The NSG mice were  
151 purchased from Jackson's laboratory and used at 8-10 weeks of age. Briefly, each  
152 female NSG mouse was implanted with a subcutaneous 60-day (0.36 mg) slow-  
153 release estradiol pellet (Innovative Research of America). Each patient tumor was  
154 equally divided into 5 chunks and implanted into the dorsal flank of 5 animals  
155 corresponding to the 5 different treatment groups. The tumors were allowed to grow  
156 for 3 weeks. For MCF-7,  $1 \times 10^6$  cells were counted and mixed in a 40-60% ratio with  
157 Matrigel Growth Factor (Bio Laboratories, Cat No. 354230). The cells are injected  
158 subcutaneously into the dorsal flank of the animals corresponding to the different  
159 treatment groups. The animals were given 20 mg/kg DOX intravenously and/or PEMFs  
160 stimulation for 1 h weekly for 5 weeks. At the end of the study, tumor volume was  
161 measured and isolated for apoptotic cell determination.

162

## 163 **Results**

### 164 **PEMF exposure impairs breast cancer cell growth *in vitro* and *in vivo***

165 PEMF exposures at an amplitude of 3 mT administered for 3 consecutive days for 1 h  
166 per day were previously shown capable of impairing MCF-7 cell viability (Fig. 1A) (8).  
167 We extend these initial findings by showing that an analogous PEMF exposure  
168 paradigm reduced viable cell counts for both MCF-7 (~34%; Fig. 1B) and MDA-MB-  
169 231 (~19%; Fig. 1C) breast cancer cell lines, whereas MCF10A normal breast cell line  
170 subjected to the same PEMF paradigm did not exhibit a change in cell number (Fig.  
171 1D) relative to unexposed (0 mT) cells. Moreover, stronger PEMF exposures (5 mT)  
172 were ineffective at killing MCF-7 and MDA-MB-231 breast cancer cells (Fig. 1B, 1C &  
173 1D). The long-term effects of magnetic field exposure were examined in the context of  
174 colony formation (22), whereby MCF-7 cells were plated at clonal density and exposed  
175 to 3 mT PEMFs for 10 successive days (Fig. 1E). Colony number (Fig. 1F) and size  
176 (Fig. 1G) were reduced relative to unexposed (0 mT) cultures, consistent with the  
177 ability of PEMFs to reduce MCF-7 cell number (Fig. 1B).

178

179

180

181

182

183

184

185

186



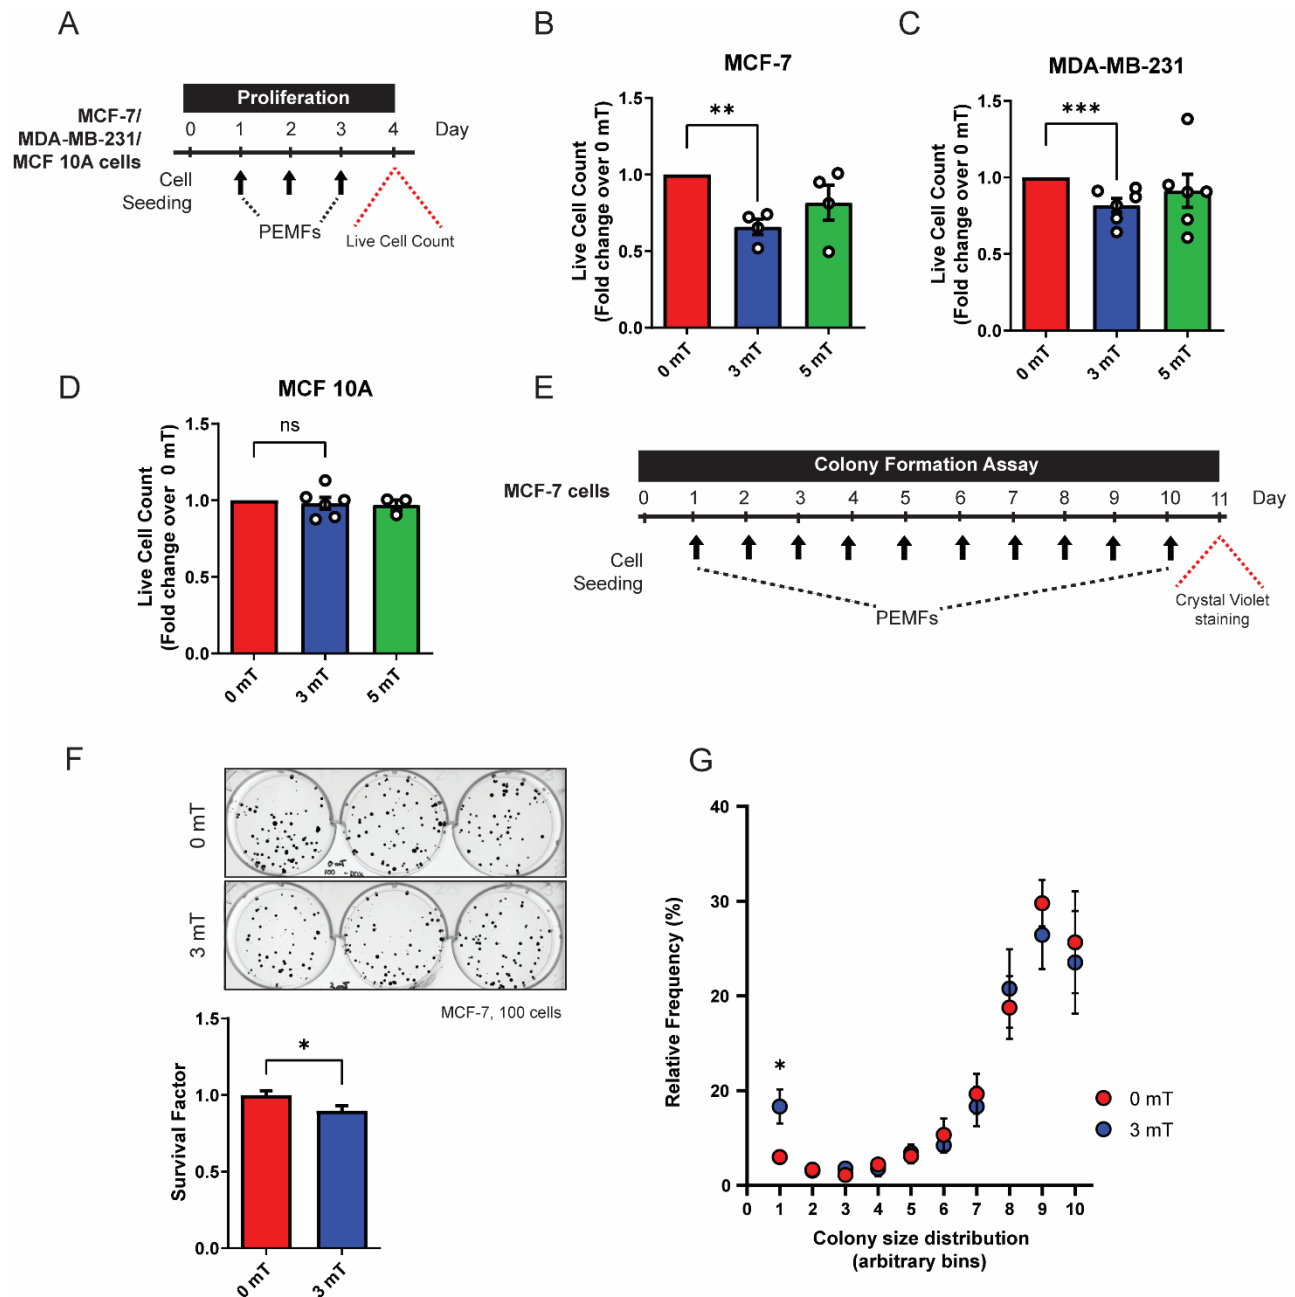

187

188 **Figure 1. PEMF exposure inhibits cancer cell growth *in vitro*.** **A)** Schematic of  
 189 PEMF exposure schedule for live cell quantification. **B, C, and D)** Live cell counts  
 190 using Trypan Blue exclusion assay for MCF-7, MDA-MB-231 and MCF10A cells. Cells  
 191 were exposed to 0 mT, 3 mT, or 5 mT PEMF for 1 h each day for 3 consecutive days  
 192 before cell count was performed. **E)** Schematic of colony formation assay schedule for  
 193 MCF-7 cells analyzed after 10 daily PEMFs exposure at 3 mT for 1 h. **F)**  
 194 Representative images of MCF-7 cell colony formation assay. Cells were seeded at  
 195 100 cells per well. Survival factor represents the number of surviving colonies per 100  
 196 cells and presented as fold change over 0 mT. **G)** Relative frequency of colonies (in  
 197 Figure F) according to their arbitrary sizes binned into 10 bins per total number of cells.  
 198 All experiments were of at least 3 independent replicates performed with \* $p < 0.05$ , \*\* $p$   
 199  $< 0.01$ , \*\*\* $p < 0.001$ . The error bars represent the standard error of the means.

200

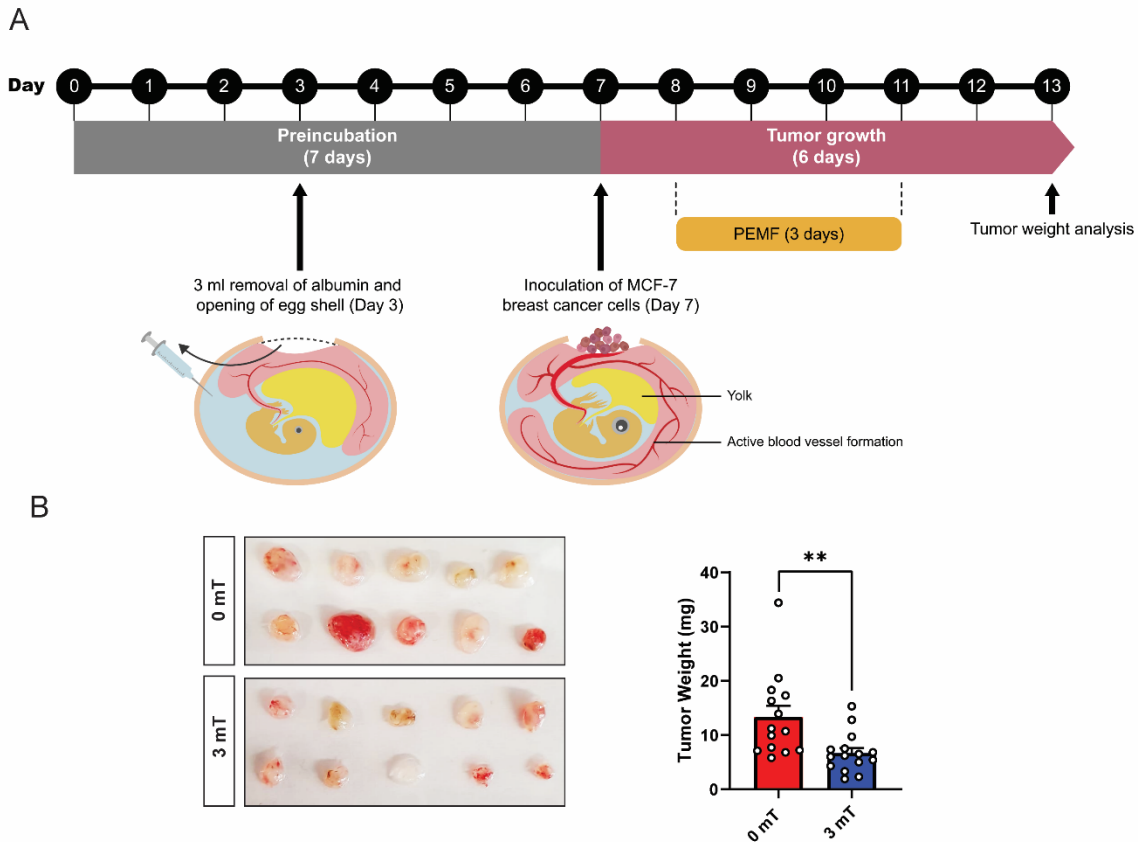

201

202 **Figure 2. PEMF inhibits breast tumor growth *in vivo*.** **A)** Schematic of the PEMF  
203 exposure paradigm used on the CAM model for MCF-7 breast tumor xenografts. MCF-  
204 7 tumors were inoculated onto CAM on day 7. The eggs were exposed to 3 mT for 1  
205 h for 3 successive days and left to grow for another 3 days before weight analysis. **B)**  
206 Images showing the size of MCF-7 tumors and the corresponding bar chart represents  
207 the pooled tumor weight (mg). Experiments were repeated twice with  $**p < 0.01$  of at  
208 least 14 independent eggs. The error bars represent the standard error of the mean.

209

210 To more closely approximate the *in vivo* scenario, the chicken chorioallantoic  
211 membrane (CAM) model was employed to explore the capability of PEMF exposure  
212 to modulate tumor growth (20). In this animal model, the absence of an immune  
213 system during early chick development allows for the stable growth of breast cancer  
214 tumors. MCF-7-derived tumors were implanted into 7-day old eggs and commencing  
215 the following day exposed to 3 mT for 1 h per day for 3 consecutive days (Fig. 2A).

216 Tumor xenografts exposed to 3 mT showed a substantial loss in tumor weight of ~50%  
217 compared to unexposed (0 mT) tumors (Fig. 2B).

218

219 **PEMF exposure increases the vulnerability of cancer cells to doxorubicin.**

220 We examined whether PEMF exposure modulates chemotherapeutic efficacy in  
221 breast cancer cells. Proliferative and colony-forming capacities were ascertained in  
222 response to 3 consecutive days of PEMF exposure in combination with 100 nM DOX,  
223 the reported DOX IC<sub>50</sub> in MCF-7 cells (23), administered on the third day (Fig. 3A).  
224 Exposure of MCF-7 cell cultures to PEMFs alone for 1 h per day for 3 consecutive  
225 days reduced the cellular DNA content by ~20% relative to unexposed control cultures  
226 (Fig. 3B; solid red, 0 mT; solid blue, 3 mT). DOX treatment alone reduced DNA content  
227 by ~35% (hatched red). The preconditioning of MCF-7 cells with two days of PEMF  
228 exposure (1 h/day) accentuated DOX-cytotoxicity by an additional ~18% (Fig. 3B;  
229 hatched blue). The effects of PEMF exposure during prolonged DOX treatment were  
230 ascertained by reducing the concentrations of DOX to 10 nM (5-fold) or 20 nM (10-  
231 fold), followed by colony analysis. MCF-7 cultures were administered DOX on days 1,  
232 4, and 7 in conjunction with daily PEMF exposure for 10 days (Fig. 3C). PEMF  
233 exposure in combination with chronic DOX administration reduced MCF-7 colony  
234 formation (Fig. 3D; bottom) more than DOX treatment alone (Fig. 3D; top). For low-  
235 density cultures, colony numbers (survival factor) were reduced by 10% and 27% in  
236 response to PEMF (Fig. 3E; solid blue) or DOX (Fig. 3E; hatched red) treatments alone,  
237 respectively, whereas combining PEMF and DOX treatments reduced colony number  
238 by 40% (Fig. 3E; hatched blue), relative to unexposed 0 mT cultures (Fig. 3E; solid  
239 red). The combination of treatments also increased and decreased the size of the

240 remaining smaller and larger colonies, respectively (Fig. 3F; bottom), consistent with  
241 a slowing of cancer growth rate at the higher DOX concentration.

242 PEMF exposure stimulates ROS production in cancer (24, 25) and non-cancer  
243 (5, 26) cells. Underlying this response is a magnetically-sensitive, TRPC1-mediated  
244 calcium entry pathway modulating mitochondrial respiration (5, 27). On the other hand,  
245 DOX increases cytoplasmic and mitochondrial ROS by disrupting mitochondrial redox  
246 cycling and function (28). Lone PEMF exposure of MCF-7 cells (Fig. 3G; solid black)  
247 increased ROS levels by ~19% over baseline (0 mT). By comparison, tert-Butyl  
248 hydroperoxide (TBH; 1 mM), a cytoplasmic pro-oxidant, increased ROS levels by ~83%  
249 that furthermore, quenched a subsequent response to PEMFs (Fig. 3G; grey). The  
250 acute administration of 10 or 50 uM DOX increased ROS levels by ~7% and ~12%,  
251 respectively, that was further augmented by PEMF exposure by ~4% (Fig. 3G; hatched  
252 pink) and ~19% (Fig. 3G; red), respectively. PEMF and DOX (50 uM) treatments hence  
253 synergistically act to raise ROS levels in naïve MCF-7 cells.

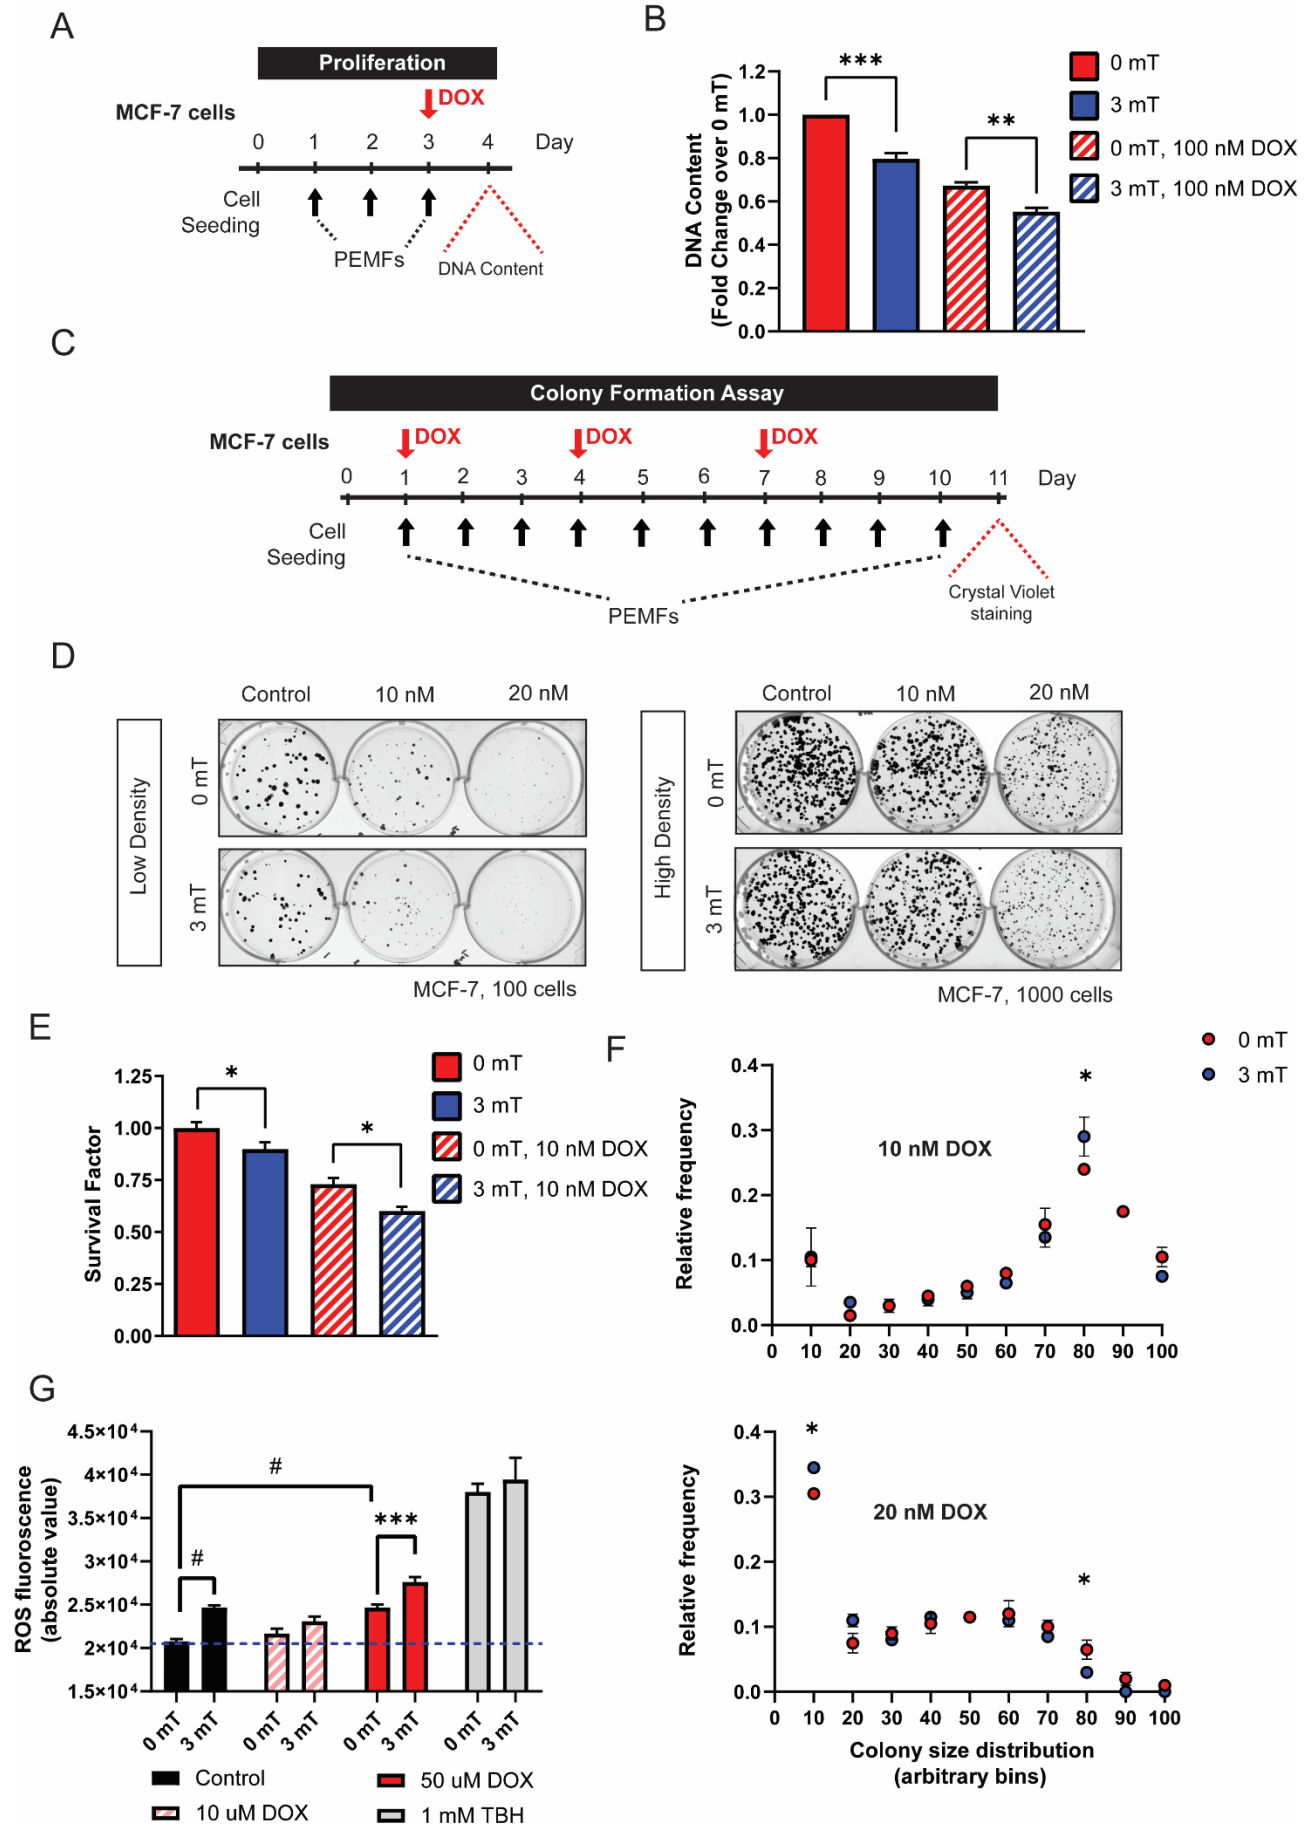

255 **Figure 3. PEMF enhances the vulnerability of cancer cells to doxorubicin *in vitro*.**  
256 **A)** Schematic of 3 mT PEMF and DOX treatment on MCF-7 cells for Cyquant DNA  
257 quantification in 96-well plate format. Cells were exposed to 3 mT for 1 h daily for 3  
258 successive days. DOX (100 nM) was treated on the final day 1 h before the last PEMF  
259 exposure. Cellular DNA content was measured 24 h after the last PEMF exposure. **B)**  
260 Bar chart shows the pooled data for Cyquant DNA content in fold change 24 h post-  
261 DOX and PEMF treatments. **C)** Schematic of colony formation assay for MCF-7 cells  
262 treated with DOX and 3 mT exposure for 10 days. **D)** Representative images of colony  
263 formation of MCF-7 cells showing dose-response with 10 and 20 nM DOX, with 0 or 3  
264 mT PEMFs. Cells were seeded at 100 or 1000 cells per well to show the combined  
265 effect of DOX and PEMFs. **E)** The corresponding bar chart shows the colony survival  
266 factor in fold-change (over 0 mT, solid red) for 10 nM DOX under low-density condition.  
267 **F)** Relative frequency of colonies per total number of cells binned according to colony  
268 size for treatment of 10 nM (top) or 20 nM (bottom) DOX under high-cell density  
269 condition, with 0 mT and 3 mT marked by red and blue dots, respectively. **G)** Bar  
270 charts show the absolute ROS fluorescence of DCH<sub>2</sub>FDA on MCF-7 cells. Cells were  
271 incubated in DCH<sub>2</sub>FDA for 30 min before washing and replacement with media  
272 containing DOX (hatched pink and red) or TBH (grey). Cells were exposed to 3 mT for  
273 10 min and immediately thereafter ROS fluorescence measurement after 20 min. The  
274 mean ROS fluorescence presented is an average of 8 technical replicates. All data  
275 presented were performed with at least 3 independent experiments with \**p* < 0.05, \*\**p*  
276 < 0.01, \*\*\**p* < 0.001 #*p* < 0.0001. The error bars represent the standard error of the  
277 mean.

278

### 279 **PEMF exposure enhances the vulnerability of breast tumors to DOX *in vivo***

280 Patient-derived breast tumor xenografts (PDX) were engrafted into  
281 immunocompromised NSG mice and allowed to grow for 3 weeks before once-weekly  
282 administration of 20 mg/kg DOX and/or exposure to PEMFs (3 mT) for 1 h per week.  
283 After 5 weeks of the indicated treatment, tumors were measured and analyzed by flow  
284 cytometry (Fig. 4A). Whereas untreated (control) tumors showed a progressive  
285 increase in volume of 87% from their initial values, the PEMF and DOX interventions  
286 instead reduced tumor volume by -55.4% and -69.8%, respectively (Fig. 4B). By  
287 contrast, the incidence of apoptotic cells increased by +1.61%, +8.8%, and +17.9% in  
288 tumors isolated from control, PEMF- and DOX-treated mice, respectively (Fig. 4C and  
289 4D). Potential synergisms between DOX and PEMF interventions were ascertained  
290 with two paradigms: (1) once weekly PEMF treatment for 2 weeks followed by 3 weeks

291 of DOX treatment alone and; 2) simultaneous weekly PEMF and DOX treatments for  
292 5 weeks. Amongst all the test conditions, paradigm 1 (Fig. 4B, green) produced the  
293 greatest reductions in tumor volume (-80.9%) and increases in apoptotic cells (+44.6%)  
294 (Fig. 4D, green), wherein tumor resorption (Fig. 4B, green) was statistically different  
295 from DOX treatment alone (brown), but not from paradigm 2 (yellow). The livers from  
296 the PEMF- and DOX-treated mice showed little signs of collateral apoptosis (Fig. 4D,  
297 black), demonstrating cytotoxic specificity for malignant tissues by the employed  
298 PEMF paradigm.

299 We also examined the effects of PEMF exposure on MDA-MB-231 and MCF-7  
300 breast cancer cells engrafted into NSG mice. MDA-MB-231 tumors from NSG mice  
301 exposed once (3 mT x 1) or twice (3 mT x 2) to PEMFs exhibited increases in apoptosis  
302 of +11% and +34% respectively, over baseline (0 mT) (Supplementary Fig. 1A and  
303 1B). Livers harvested from these mice similarly did not show any significant increase  
304 in apoptosis (Supplementary Fig. 1C). MCF-7 xenografts were also subjected to the  
305 same PEMF/DOX paradigm previously employed in Figure 4 (Supplementary Fig. 2A).  
306 Again, PEMF and DOX treatments synergized to promote cancer cytotoxicity,  
307 achieving +24% and +33% apoptosis (early plus late) for tumors subjected to  
308 paradigms 1 (PEMF then DOX) and 2 (PEMF and DOX), respectively (Supplementary  
309 Fig. 2B). The percentages of apoptosis obtained from paradigms 1 and 2 was greater  
310 than those achieved with lone DOX (+14%), PEMF (+8%), or baseline (0 mT) (+0.3%)  
311 treatments. Although these responses were more modest than previously obtained in  
312 the PDX mouse trial (Fig. 4), synergism between DOX and PEMF treatments in  
313 undermining *in vivo* cancer growth remained evident.

314

315

316

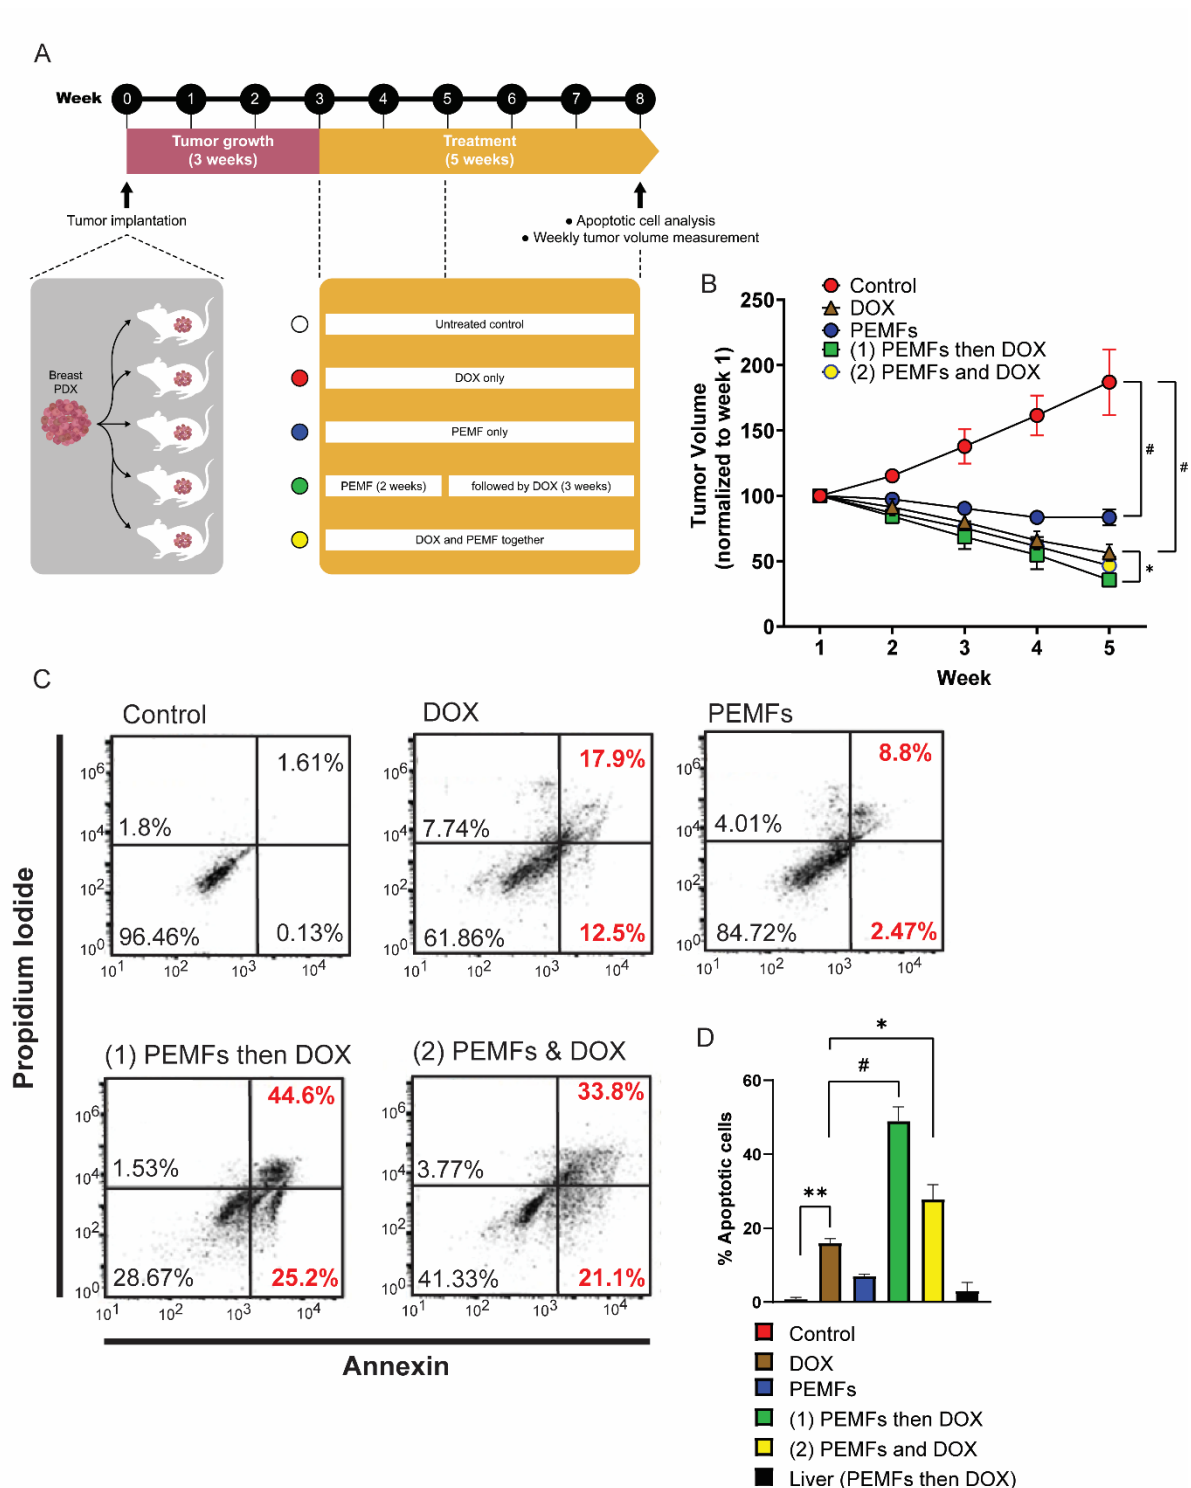

317

318 **Figure 4. PEMFs synergize with DOX to inhibit tumor growth *in vivo*.** **A)** Schematic  
 319 of PEMF and DOX exposures weekly on patient-derived tumor xenograft in mice.  
 320 Implanted tumors were allowed to grow for 3 weeks before the initiation of DOX and/or  
 321 PEMF treatment. Tumor volume was measured every week while apoptotic cell  
 322 determination was performed at the end of the study. Each data point represents the



323 mean from 5 experimental runs derived from the tumors obtained from 5 patients, each  
324 of which was equally divided amongst the 5 treatment groups. **B)** Point graph showing  
325 the pooled data of tumor volume ( $\text{mm}^3$ ), measured for 5 consecutive weeks. **C)**  
326 Representative scatter dot-plots showing cell population of dissociated tumors sorted  
327 based on annexin and propidium iodide staining. **D)** Bar chart represents pooled data  
328 of apoptotic cell percentages analyzed using flow cytometry.  $N = 5$  mice, with  $*p <$   
329  $0.05$ ,  $**p < 0.01$ , and  $\#p < 0.0001$ . The error bars are expressed as the standard error  
330 of the mean.

331

### 332 **Chronic DOX exposure reduces TRPC1 expression resulting in DOX-** 333 **chemoresistance**

334 PEMF exposure enhances TRPC1-mediated calcium entry and consequent  
335 engagement of the calcineurin-NFAT signaling axis involved in cellular homeostasis  
336 (5). In certain cancers, however, TRP hyperactivity may overwhelm NFAT-mediated  
337 (29) calcium and mitochondrial cellular homeostatic mechanisms (30), negatively  
338 selecting against cancer cells with inherently high TRP channel expression. To  
339 elucidate potential commonalities in mechanisms of action, we investigated TRPC1  
340 channel expression levels in MCF-7 cells surviving either chronic PEMF and/or DOX  
341 exposures. MCF-7 cells were exposed to PEMFs for 10 consecutive days with the  
342 renewal of a sub- $\text{IC}_{50}$  dose of DOX (20 nM) on days 1, 4, and 7 (Fig. 5A). Chronic  
343 DOX treatment alone (Fig. 5B; hatched red) reduced TRPC1 protein expression to 53%  
344 of control levels (solid red) and could be further reduced to 37% (hatched blue) of  
345 control levels with combined DOX and PEMF chronic treatment. By contrast, daily  
346 PEMF exposure alone did not reduce TRPC1 expression (solid blue). Furthermore,  
347 growth under chronic and progressive DOX treatment ( $\leq 96$  nM) produced a stable  
348 DOX-resistant MCF-7 cell line (MCF-7/ADR) exhibiting attenuated TRPC1 expression  
349 (-36%) (Fig. 5C; hatched black) and proliferation (-90%) (Fig. 5D; hatched black).  
350 When serially passaged ( $>5$  times) in the absence of DOX, however, MCF-7/ADR cells

351 partially regained proliferative capacity and *TRPC1* expression (Fig. 5D, yellow).  
352 Therefore, chronic DOX exposure at the predetermined cytotoxic dose (23) was shown  
353 capable of negatively selecting against breast cancer cells with innately elevated  
354 *TRPC1* expression to produce cellular progeny elaborating depressed *TRPC1*  
355 expression, proliferative capacity and chemosensitivity. These findings reveal a  
356 relationship between DOX sensitivity and *TRPC1* expression levels, aligning with  
357 previous findings that DOX targets proliferating cells (31) and that *TRPC1* promotes  
358 proliferation (5).

359 Basal *TRPC1* channel expression was next correlated to malignancy status.  
360 MCF-7 and MDA-MB-231 breast cancer cells exhibited higher relative abundances of  
361 *TRPC1* protein than the non-malignant MCF10A breast cells. Specifically, we found  
362 MCF-7 cells showed greater *TRPC1* expression than the more malignant MDA-MB-  
363 231 cells (32) (Fig. 5E). Notably, MDA-MB-231 cells were also more invasive than  
364 MCF-7 cells as determined by their ability to infiltrate through a basement membrane  
365 (Fig. 5F), in agreement with published studies (32, 33). Higher *TRPC1* channel  
366 expression was also observed in the less invasive LNCaP prostate cancer cell line  
367 relative to the highly metastatic PC3 prostate cancer cell line (34) (Fig. 5G),  
368 recapitulating the correlation between *TRPC1* channel expression and metastatic  
369 status.

A

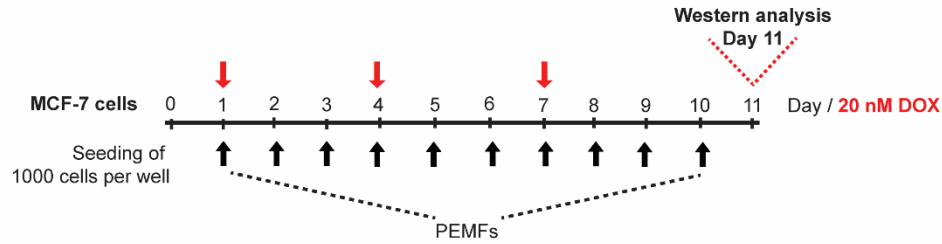

B

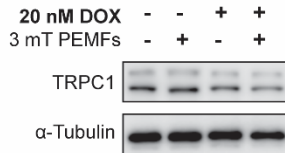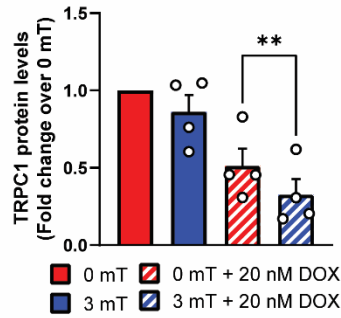

C

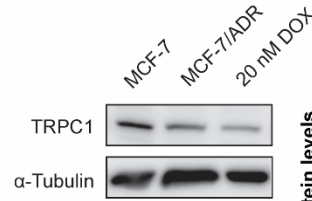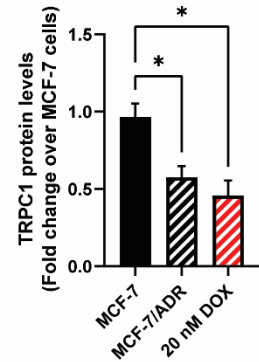

D

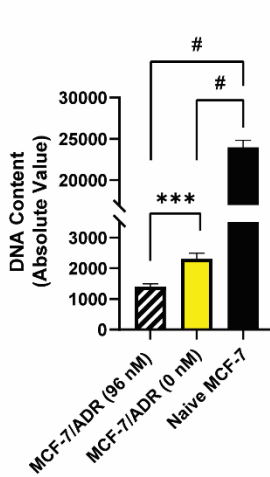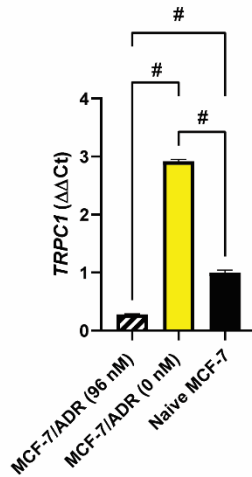

E

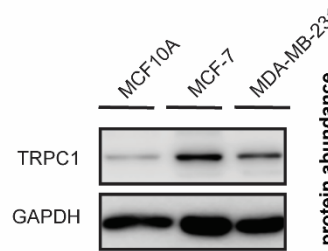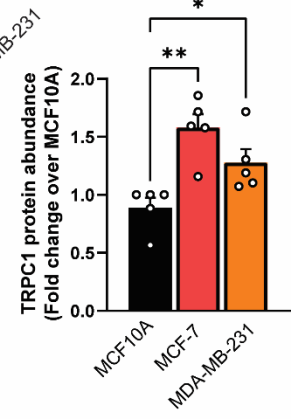

F

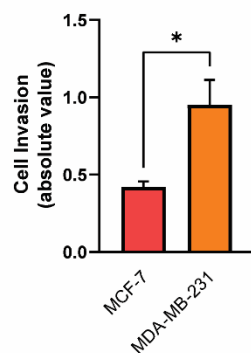

G

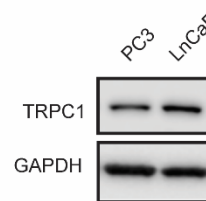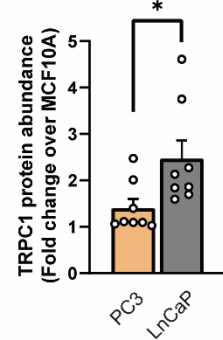

370

371 Figure 5. **DOX-chemoresistance and metastatic status are associated with**  
 372 **TRPC1 channel downregulation.** **A)** PEMF and DOX (red arrow) treatment paradigm  
 373 used for TRPC1 protein analysis. **B)** Representative western blot showing the changes  
 374 in TRPC1 levels after PEMF and DOX treatment on day 11. The corresponding bar  
 375 chart represents pooled data of TRPC1 protein levels normalized to unexposed 0 mT.

376 Cells treated with DOX are represented by the hatched bars, with either 0 or 3 mT  
377 PEMFs. **C)** Representative western blot showing the relative fold change of TRPC1  
378 protein in MCF-7/ADR (96 nM DOX; hatched black) and 11-day 20 nM DOX-treated  
379 MCF-7 cells (red) relative to naïve MCF-7 cells (solid black). Naïve MCF-7 and MCF-  
380 7/ADR cells were grown in culture for 3 days before western analysis. **D)** Cell growth  
381 comparison (72 h post-seeding) and *TRPC1* transcript levels between MCF-7/ADR  
382 (96 nM), MCF-7/ADR (0 nM) and naïve MCF-7 cells. MCF-7/ADR (96 nM) cells were  
383 generated using progressive DOX treatment up to 96 nM (hatched black). MCF-7/ADR  
384 (0 nM) corresponds to the cell whereby MCF7/ADR (96 nM) cells were serially  
385 passaged in the absence of DOX to give rise to MCF-7/ADR (0 nM) (yellow). **E)**  
386 Western analysis showing the relative expression of TRPC1 channel protein in non-  
387 malignant (MCF10A) and malignant breast cancer cells (MCF-7 and MDA-MB-231)  
388 after 48 h of growth under standard conditions. The corresponding bar chart shows  
389 the pooled data in fold change of TRPC1 expression normalized to MCF10A. **F)** Cell  
390 invasion comparison between breast cancer malignant cell lines, MCF-7 and MDA-  
391 MB-231 cells. Cells were seeded at high density and analyzed 48 h post-seeding. **G)**  
392 TRPC1 protein expression in metastatic prostate cancer cell lines PC3 and LnCaP  
393 (invasive status: PC3 > LnCaP). All results presented are of at least 3 independent  
394 experiments with \* $p < 0.05$ , \*\* $p < 0.01$ \*\*\*,  $p < 0.001$ , and # $p < 0.0001$ . The error bars  
395 represent the standard error of the mean.

396

### 397 **TRPC1 overexpression enhances MCF-7 proliferation and EMT, but attenuates** 398 **migratory capacity**

399 A potential interplay between TRPC1 channel expression and proliferative, migratory  
400 capacities and epithelial-mesenchymal transition (EMT) indices was investigated. A  
401 TRPC1-GFP fusion protein overexpressing MCF-7 cell line (MCF-7/TRPC1) was  
402 generated and validated by western (Fig. 6A), qPCR (Fig. 6B), and  
403 immunofluorescence (Fig. 6C) analyses. As a relevant negative control, a stable cell  
404 line expressing the GFP vector was also generated. The GFP-TRPC1 fusion protein  
405 was highly expressed in the MCF-7/TRPC1 cells (Fig. 6A), exhibiting a 12-fold  
406 increase in *TRPC1* transcript levels compared to vector cells (Fig. 6B). Enhanced  
407 fusion protein expression was also verified using fluorescence imaging (Fig. 6C).  
408 MCF-7/TRPC1 (green) exhibited enhanced proliferation compared to vector-  
409 transfected cells (black) (Fig. 6D) and was corroborated by the elevated protein  
410 expression of Cyclin D1 (Fig. 6E). On the other hand, MCF-7/TRPC1 cells migrated

411 more slowly (Fig. 6F; bottom) than vector control cells (Fig. 6F; top), manifested as a  
412 delayed closure of an introduced gap (Fig. 6G). TRPC1 overexpression also increased  
413 the gene expression of the EMT transcriptional activators, *SLUG*, and *SNAIL* (Fig. 6H),  
414 responsible for the metastatic reprogramming (35). Consistent with published findings,  
415 *SLUG* activation increased *VIMENTIN* transcript (Fig. 6H) and protein (Fig. 6I) levels  
416 (35), concomitant with decreases in E-cadherin transcript (Fig. 6H) and protein (Fig.  
417 6J) levels, in accordance with transcriptional inhibition of E-Cadherin by Slug and Snail  
418 (36) and reported E-cadherin modulation in breast cancer tumors (37) and cells (38).  
419 Conversely, *TRPC1* silencing by dsRNA transfection resulted in the downregulation  
420 of *SLUG* and *VIMENTIN* transcripts, with corresponding increases in *E-CADHERIN*  
421 transcripts, while *SNAIL* levels remained unchanged (Fig. 6K). The dsRNA silencing  
422 of TRPC1 in naïve MCF-7 cells also reduced basal proliferation relative to scrambled  
423 RNA-transfected cells (Fig. 6L), corroborating the role of TRPC1 as a proliferation  
424 modulator and providing further evidence for TRPC1 involvement in breast cancer  
425 metastatic reprogramming.

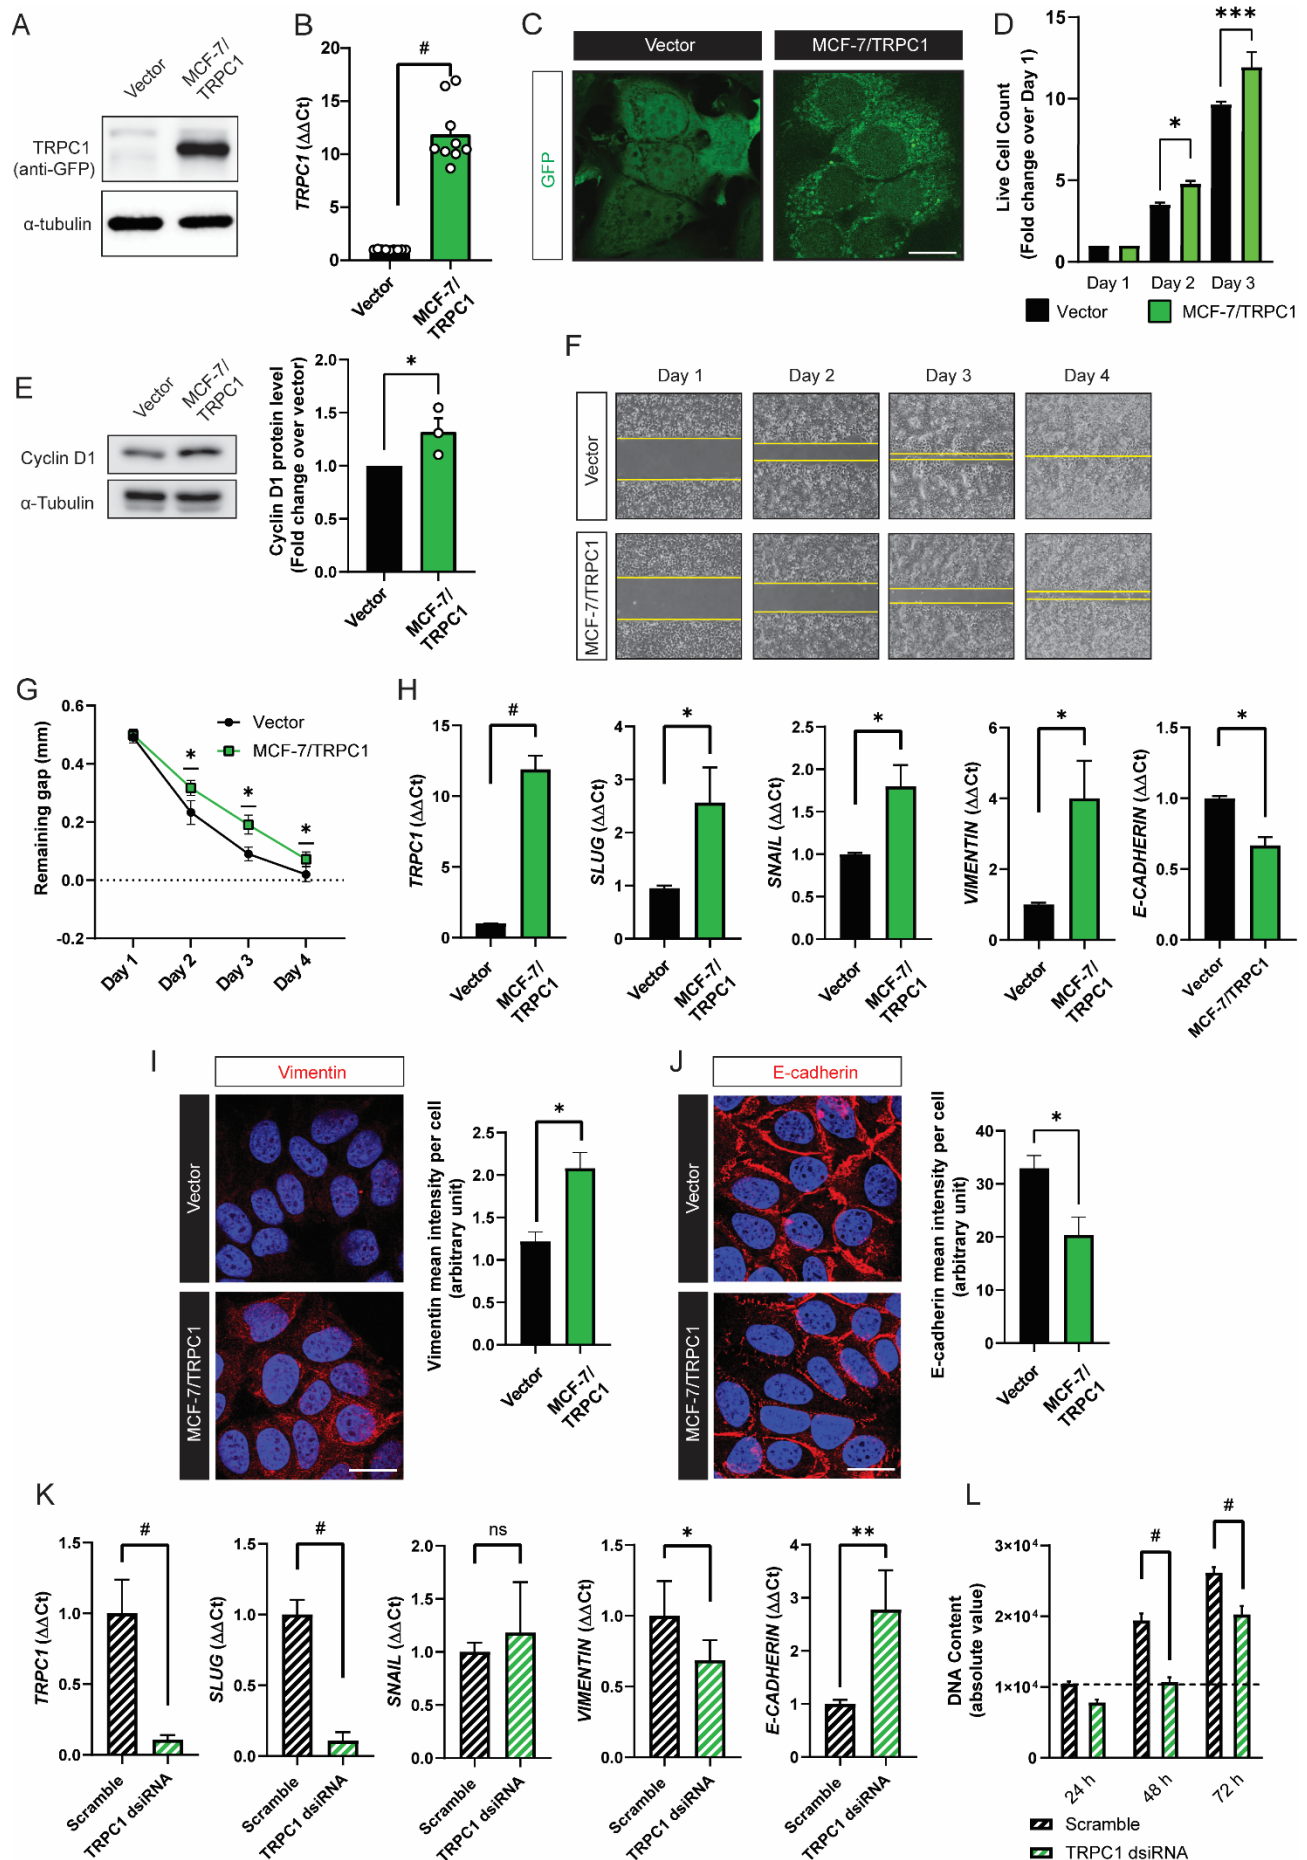

427 **Figure 6. Characterization of TRPC1 overexpressing MCF-7 cell line.** **A)** Western  
428 analysis showing the overexpression of GFP-TRPC1 in TRPC1 cells, stained using  
429 anti-GFP antibody. **B)** Bar chart shows  $\Delta\Delta C_t$  fold change of *TRPC1* transcript in MCF-  
430 7/TRPC1 cells (green) and vector-transfected cells (black). **C)** Fluorescence images  
431 showing GFP and GFP-TRPC1 in vector and MCF-7/TRPC1 cells, respectively. Scale  
432 bar = 10  $\mu\text{m}$ . **D)** Bar chart showing live cell counts of stable cells over 3 days. **E)**  
433 Western analysis showing cyclin D1 protein levels 24 h post-seeding. **F)**  
434 Representative images of the migration assay over 4 days. Stable cells were seeded  
435 at high density one day before the removal of the insert to create a 0.5 mm gap. **G)**  
436 The corresponding line chart shows the remaining gap over 4 days for the migration  
437 assay. **H)** Transcript levels of *TRPC1*, *SLUG*, *SNAIL*, *VIMENTIN*, and *E-CADHERIN*  
438 in vector and MCF-7/TRPC1 cells. **I) and J)** Representative confocal images of vector  
439 and MCF-7/TRPC1 cells stained for Vimentin and E-Cadherin, with the corresponding  
440 bar charts showing mean intensity per cell, measured using absolute fluorescence  
441 intensity normalized to the total number of nuclei per view. **K)** Bar charts showing the  
442 transcript expression of *TRPC1*, *SLUG*, *SNAIL*, *VIMENTIN*, and *E-CADHERIN* in  
443 scrambled- and *TRPC1*-silenced cells. **L)** Examination of cell proliferation over 3 days  
444 using Cyquant DNA content analysis on *TRPC1*-silenced cells in relative to scramble  
445 RNA-transfected cells. *TRPC1* silencing was achieved using 2 independent dsRNAs  
446 and the bar charts show the pooled data from the respective experiments. All results  
447 were of at least 3 independent experiments with \*  $p < 0.05$ , \*\*  $p < 0.01$ , \*\*\*  $p < 0.001$ ,  
448 #  $p < 0.0001$ . The error bars represent the standard error of the mean.

449

#### 450 **PEMF exposure slows migration and increases invasiveness in TRPC1-** 451 **overexpressing breast cancer cells**

452 PEMF exposure (3 mT) further decelerated the migration of MCF-7/TRPC1 cells  
453 compared to unexposed (0 mT) MCF-7/TRPC1 cells (Fig. 7A, B). By contrast, the  
454 vector cells were insensitive to PEMF exposure (Fig. 7A, C). Invasiveness was  
455 ascertained by examining the ability of cells to break down, penetrate, and transverse  
456 a basement membrane-coated insert (Fig. 7D). According to this criteria, MCF-  
457 7/TRPC1 cells exhibited an invasive phenotype (Fig. 7D; green), comparable in  
458 magnitude to TGF $\beta$ -stimulated control cells (grey) and exceeding that of unstimulated  
459 control cells (black). PEMF exposure, attenuated the invasive capacity of MCF-  
460 7/TRPC1 cells (hatched green), but not of TGF $\beta$ -stimulated cells (hatched grey). As  
461 the invasiveness of MCF-7/TRPC1 was accompanied by an increase in the number of  
462 non-invading cells on the upper side of the culture insert (Fig. 7E), a causal relationship

463 may exist between proliferation rate and invasive capacity as ascertained by this assay  
464 that initially may seem paradoxical given that TRPC1 overexpression (shown to  
465 augment proliferation; Fig. 6D and 6E) promotes invasiveness while slowing migration.  
466 On the other hand, the finding that PEMF exposure reduces invasiveness by  
467 attenuating both cell proliferation and migratory capacity is internally consistent and  
468 clinically exploitable. Agreeing with demonstrated transcriptional inhibition of E-  
469 cadherin in response to elevations in *SNAIL* and *SLUG* (Fig. 6H, J), E-cadherin protein  
470 levels were found to be reduced in MCF-7/TRPC1 cells (Fig. 7F). However, E-cadherin  
471 levels were unchanged by PEMF exposure (Fig. 7F), possibly reflecting an offsetting  
472 combination of PEMF-mediated TRPC1 downregulation (Fig. 5B), augmenting E-  
473 cadherin levels (Fig. 6K), and a PEMF-induced slowing of cell migration (Fig. 7A, B),  
474 reinstating E-cadherin levels (39).

475

476

477

478

479

480

481

482

483

484

485

486

487

488

489

490



A

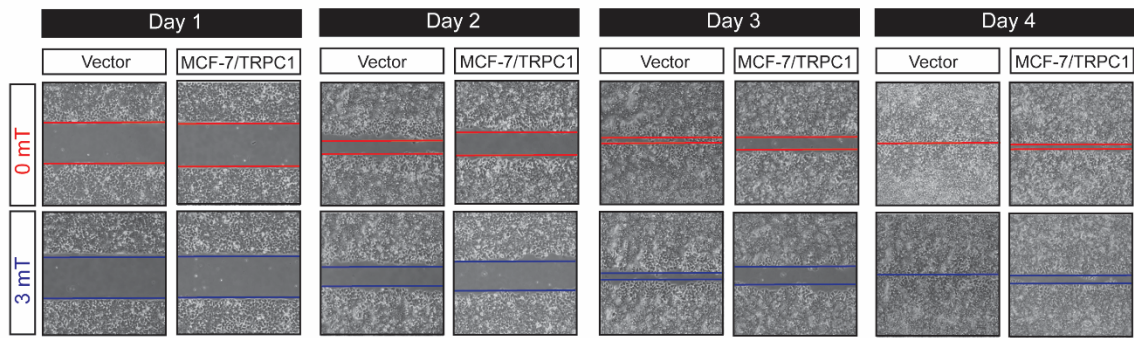

B

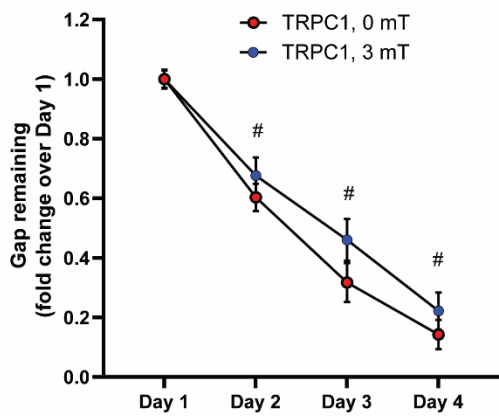

C

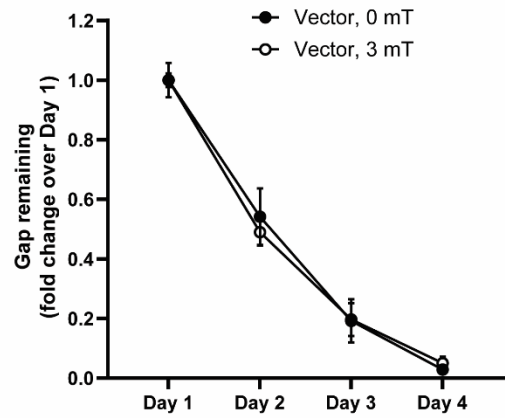

D

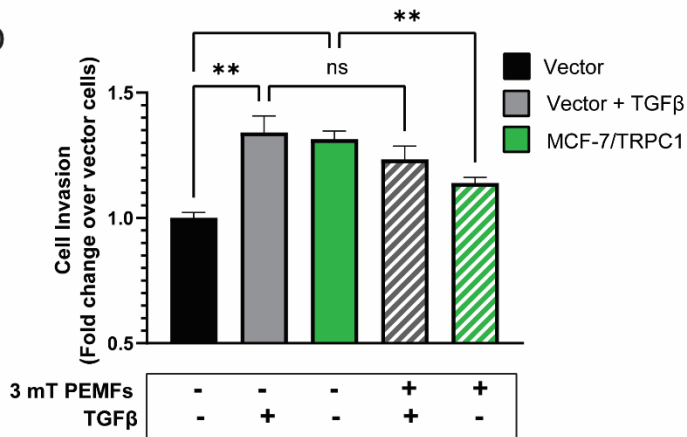

E

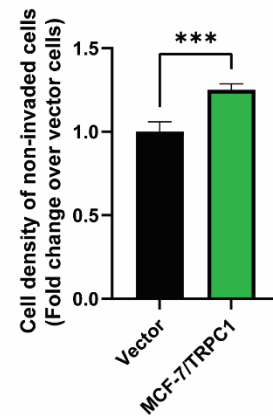

F

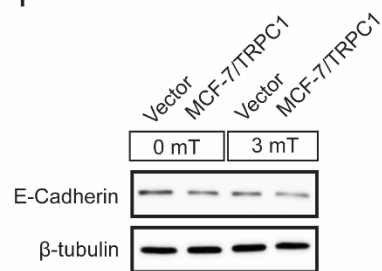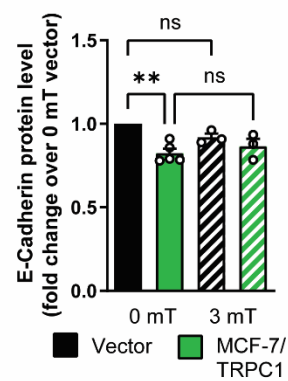

492 **Figure 7. PEMF exposure attenuates migration and invasion of MCF-7/TRPC1**  
493 **cells. A)** Representative images showing the migration of vector-transfected and  
494 MCF-7/TRPC1 cells exposed to 0 or 3 mT PEMFs. Cells were plated at 30,000 cells  
495 per gap of the culture insert on day 0 and allowed to settle for 24 h before the removal  
496 of the insert. Cells were exposed to 3 mT once, twice, or thrice for 1 h daily, on days  
497 2, 3, and 4, respectively. The corresponding bar charts represent the pooled data of  
498 **B)** MCF-7/TRPC1 (0 and 3 mT), and **C)** vector (0 and 3 mT), showing the remaining  
499 gap expressed as normalized fold change to day 1 of their respective cell line. **D)** Bar  
500 chart showing stained invasive cells at the bottom of the basal membrane expressed  
501 as fold change over vector cells. The stained cells correspond to those successfully  
502 invading the basal membrane after 48 h. Untreated vector cells serve as a control for  
503 basal cell invasion (black). The second (solid grey) and fourth (hatched grey) bar show  
504 vector cells that had been treated with TGF $\beta$  during seeding to promote invasion at  
505 plating and 24 h later. The hatched bars correspond to cells exposed to 3 mT PEMF.  
506 **E)** Analysis of cell density on the upper insert of the chamber after 48 h post-seeding.  
507 The cells were stained and lysed using the same schedule as for the invasion assay.  
508 **F)** Western analysis showing E-cadherin protein expression in vector and MCF-  
509 7/TRPC1 cells with 3 mT PEMF exposure for 1 h for 3 consecutive days. The bar chart  
510 represents fold change pooled data for E-cadherin protein expression levels  
511 normalized to 0 mT of vector cells. All results were of at least 3 independent  
512 experiments with  $*p < 0.05$ ,  $**p < 0.01$ ,  $\#p < 0.0001$ . The error bars are expressed as  
513 the standard error of the mean.

514

## 515 **TRPC1 overexpression increases breast cancer cell sensitivity to DOX and** 516 **PEMFs**

517 TRPC1 downregulation induces chemoresistance in ovarian cancer (19). Analogously,  
518 chronic DOX exposure reduced TRPC1 expression and promoted DOX-resistance in  
519 MCF-7 cells (Fig. 5B and 5C). Whether TRPC1 overexpression enhanced sensitivity  
520 to DOX and/or PEMF exposure was next examined. DOX was administered to MCF-  
521 7/TRPC1 cells for 4 days with or without PEMF exposure for 3 days (Fig. 8A). PEMF  
522 exposure *per se* mitigated cell growth for both MCF-7/TRPC1 (Fig. 8B; green, solid  
523 and hatched) and vector (black, solid and hatched) cells. A low dose of DOX (10 nM)  
524 produced depressions of proliferation for both MCF-7/TRPC1 (32%) and vector cells  
525 (20%), yet precluded a response to PEMF exposure in either scenario (Fig. 8B). By  
526 contrast, a higher dose of DOX (20 nM) produced strong proliferation depressions in

527 both MCF-7/TRPC1 (69%) and vector (77%) cells that were further augmented by  
528 PEMF exposure.

529 Colony-forming assays demonstrated an enhanced vulnerability of MCF-  
530 7/TRPC1 cells to low doses (10 nM) of DOX (Fig. 8C, middle column, second row),  
531 resulting in fewer and smaller colonies compared to vector cultures (Fig. 8C, middle  
532 column, top row). While higher doses (20 nM) of DOX further reduced colony number  
533 substantially, colony size was only modestly reduced (Fig. 8C, right column) and an  
534 effect of PEMF exposure (Fig. 8C, left column, second and bottom rows) was less  
535 obvious than that of TRPC1 overexpression *per se* (Fig. 8C, left column, 3rd and  
536 bottom rows). TRPC1 overexpression in itself was sufficient to enhance susceptibility  
537 to 10 nM DOX as depicted by the differences in the white (vector) and red (TRPC1  
538 overexpressors) circles (Fig. 8D and 8E) in the colony size distribution plots. PEMF  
539 exposure produced a relative shift towards more numerous smaller colonies (bin 1)  
540 and fewer larger colonies (bin 7) in MCF-7/TRPC1 cells (Fig. 8E) relative to vector  
541 cells (Fig. 8D). TRPC1 overexpression appears to have made the MCF-7/TRPC1 cells  
542 hypersensitive to 20 nM DOX to the point of precluding any further PEMF-induced  
543 attenuation in colony size (Fig. 8G; blue dots), contrasting with our previous finding  
544 with naïve MCF-7 cells of PEMF-induced colony size attenuation in the presence of  
545 20 nM DOX (Fig. 3F). On the other hand, *TRPC1*-silenced cells (Fig. 8H; green,  
546 dsRNA 13.1, 13.2, and 13.3) exhibited reduced basal proliferation and were  
547 insensitive to PEMF exposure (hatched green), whereas untransfected (hatched black)  
548 or scramble RNA transfected cells (hatched grey) showed depressed proliferation in  
549 response to PEMF exposure. In the presence of 20 nM DOX, PEMF synergistically  
550 attenuated cell proliferation in the scramble RNA-transfected cells (Fig. 8I, solid and  
551 hatched grey), but not in *TRPC1*-silenced cells (solid and hatched blue),

552 demonstrating that TRPC1 channel expression level establishes both DOX- and  
 553 PEMF-sensitivities.

554

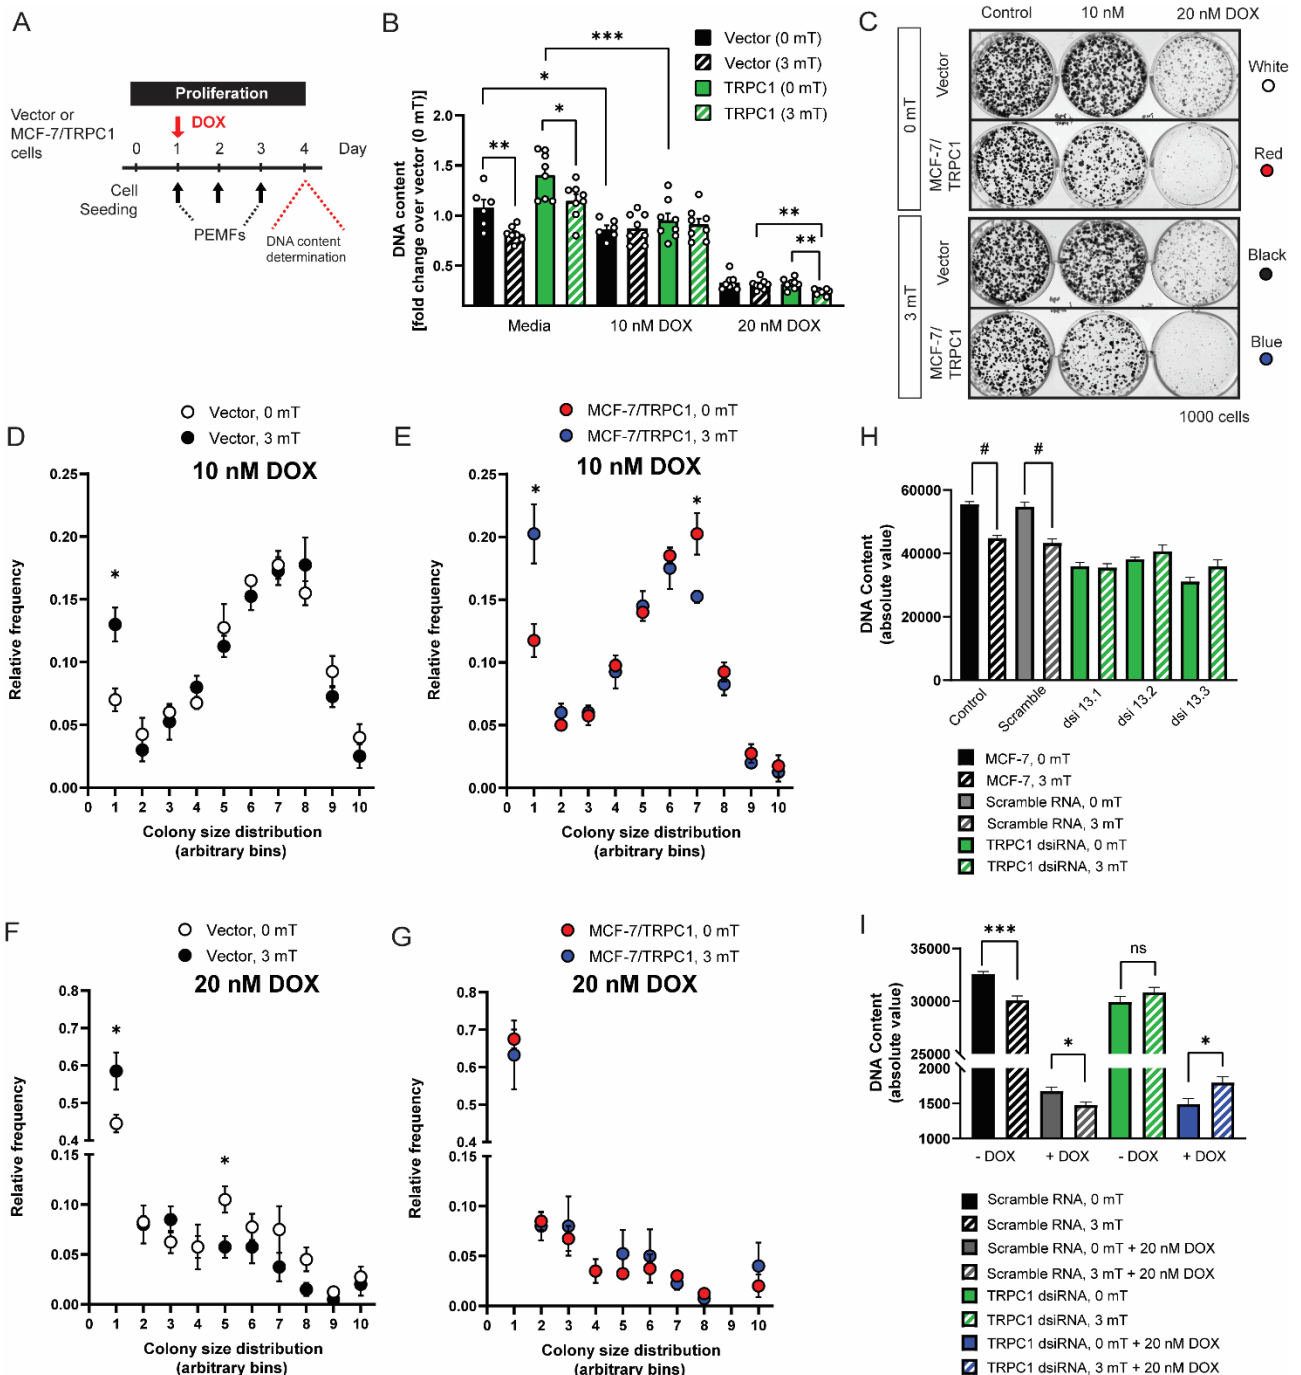

555

556 **Figure 8. TRPC1 overexpression sensitizes breast cancer cells to doxorubicin**  
 557 **and PEMFs.** **A)** Schematic of PEMF and DOX treatment paradigms on MCF-7/TRPC1  
 558 cells for proliferation assessment using Cyquant DNA content analysis. **B)** Bar chart

559 represents pooled data showing fold change of DNA content normalized to 0 mT  
560 vector cells. Statistical analysis was done using the two-sample *t*-test. **C)**  
561 Representative colony formation assay over 11 days of cells treated with 10 nM or 20  
562 nM DOX, with or without 3 mT PEMF exposure. Colony size-frequency distribution  
563 histogram normalized to the total number of colonies in the presence of either **D)** 10  
564 nM DOX on vector, **E)** 10 nM DOX on MCF-7/TRPC1, **F)** 20 nM DOX on vector, or **G)**  
565 20 nM DOX on MCF-7/TRPC1 cells, in combination with daily PEMF exposure. The \*  
566 in (D), (E), and (F) represents a statistical difference between 0 mT and 3 mT of the  
567 respective mean relative frequencies compared within the same colony size bin. **H)**  
568 Proliferation of *TRPC1*-silenced MCF-7 cells 48 h post dsiRNA transfection. Cells were  
569 transfected with three independent dsiRNA (green), including a scramble RNA (grey).  
570 Control cells (black) were left untreated but exposed to the same 0 mT (solid bars) or  
571 3 mT (hatched bars). **I)** Combined effect of PEMF and DOX treatments on the  
572 proliferation of *TRPC1*-silenced cells. Cells were treated with 20 nM DOX and PEMF  
573 24 h post dsiRNA transfection followed by another exposure of PEMF one day before  
574 DNA content analysis. Hatched bars represent cells exposed to 3 mT PEMF. The data  
575 for *TRPC1* dsiRNA (green and blue) was pooled data from two independent *TRPC1*  
576 dsiRNAs. The statistical analysis was generated using Multiple unpaired *t*-test for the  
577 comparison of two sample means within the same colony size. All experiments were  
578 of at least 3 independent experiments with \**p* < 0.05, \*\**p* < 0.01, \*\*\**p* < 0.001, and #*p*  
579 < 0.0001. The error bars represent the standard error of the means.

580

## 581 **Discussion**

582 Initial evidence was provided of the anti-cancer attributes of an analogous pulsing  
583 magnetic field paradigm as employed in this study (8). We corroborated these earlier  
584 results by showing that identical PEMF exposure mitigated MCF-7 growth without  
585 affecting that of nonmalignant MCF10A cells and moreover, extended cancer-specific  
586 PEMF-induced cytotoxicity to include the MDA-MB-231 breast cancer cell line. These  
587 findings were further substantiated *in vivo* using the CAM model as a host for MCF-7  
588 tumors. Consistent with our *in vitro* findings, the CAM-bearing tumors showed a  
589 significant attenuation in tumor weight and size in response to PEMF exposure (Fig.  
590 2B).

591 We also provided evidence that PEMF therapy demonstrates potential to serve  
592 as a companion therapy to conventional chemotherapy. Synergism between PEMF

593 exposure and DOX administration was explored using acute and chronic *in vitro*  
594 paradigms. Under the acute paradigm, MCF-7 cells were exposed to PEMFs over 3  
595 successive days and once administered the *in vitro* IC<sub>50</sub> dose of DOX (100 nM),  
596 whereas under the chronic paradigm MCF-7 cells were exposed to PEMFs for 10  
597 successive days with thrice replenishment of DOX at subacute doses of 10-20 nM.  
598 Therapeutic synergism between PEMF and DOX treatments was observed in both the  
599 acute and chronic paradigms, demonstrating potentiated depressions in proliferation  
600 (Fig. 3B) and colony-growing capacity (Fig. 3D, 3E, and 3F), respectively. PEMF  
601 exposure also synergized with pemetrexed and cisplatin when tested in the acute  
602 paradigm, although with lower efficacy than with DOX (Supplementary Fig. 3A and  
603 3B).

604 PEMF and DOX treatments modulate cancer viability via their mutual abilities  
605 to enhance oxidative stress (3, 5). PEMF exposure produces ROS by stimulating  
606 mitochondrial respiration (5), whereas DOX-induced ROS production is both  
607 cytoplasmic and mitochondrial in origin and arises from a process of redox cycling that  
608 instead is detrimental to mitochondrial function (3). We show that PEMF and DOX  
609 treatments synergize to augment ROS production, creating a sufficiently critical  
610 oxidative environment to induce cancer cell killing *in vitro*. The *in vivo* efficacy of PEMF  
611 and DOX treatments, separately or in combination, was demonstrated in NSG mice.  
612 The greatest reductions in patient-derived tumor size were accompanied by the largest  
613 increases in apoptosis and occurred by preceding 3 weeks of DOX chemotherapy with  
614 2 weeks of PEMF exposure. In humans, magnetic therapy offers the advantage of  
615 being targetable to a body region inflicted with cancer for localized synergism with  
616 systemic DOX administration, potentially allowing for the lowering of

617 chemotherapeutic dose and reducing the severity of collateral cytotoxic DOX-TRPC  
618 channel interactions, such as doxorubicin-induced cardiotoxicity (40).

619

### 620 ***Magnetic Mitohormesis in Cancer***

621 Mitohormesis describes a developmental process whereby low levels of oxidative  
622 stress instill mitochondrial survival adaptations by augmenting a cell's antioxidant  
623 defenses, whereas exaggerated elevations in ROS overwhelm a cell's existing  
624 antioxidant defenses to instead stymie cell survival (7). TRPC1 function was shown to  
625 be necessary and sufficient to confer mitochondrial responses to magnetic fields,  
626 ultimately invoking a novel process of magnetic mitohormesis (9). PEMF exposure  
627 undermines MCF-7 cell growth (Fig. 3B, 3E, and 3F) in correlation with TRPC1  
628 expression (Fig. 5E), possibly due to the over-stimulation of this recently elucidated  
629 calcium-mitochondrial axis (Fig. 3G) (5, 9). This same PEMF protocol was better  
630 tolerated by MDA-MB-231 breast cancer cells that exhibit lower expression levels of  
631 TRPC1 (Fig. 1C, 5E). Our results are in general agreement with previous studies  
632 drawing a correlation between TRPC1 expression and the malignancy status of  
633 several forms of cancer (17, 19, 34). Magnetic-sensitivity and downstream  
634 mitochondrial activation was previously shown to be specifically correlated with  
635 TRPC1 developmental and genetic expression and function (5, 9, 27, 41), whereas  
636 the expression of other TRP channels did not show such a strong correlation (5, 27,  
637 41) and genetic silencing of TRPM7 was unable to preclude magnetic sensitivity (5).  
638 The magnetic sensitivity conferred by TRPC1 and its relevance to mitohormetic  
639 survival mechanisms make it a valuable target for clinical exploitation in cancer  
640 treatment (5, 9, 27).

641

642 ***TRPC1 Channel in Cancer***

643 Elevated TRPC1 expression is associated with hypoxia-induced EMT in breast cancer  
644 cells (42). Here, TRPC1 overexpression was shown to increase MCF-7 proliferation  
645 and sensitivity to DOX yet, reduced migratory capacity. In a similar manner, the  
646 overexpression of miR-146b, an inflammatory modulator (43), enhanced the  
647 proliferation and chemosensitivity (cisplatin and paclitaxel) of epithelial ovarian  
648 carcinoma cells while attenuating migratory capacity (44). Therefore, under modest  
649 inflammatory conditions, such as those induced with the overexpression of TRPC1 or  
650 miR-146b, the proliferative capacities and chemosensitivities of certain cancers  
651 increase, whereas migratory capacities are diminished. Provocatively, these  
652 dichotomous proliferative and migratory responses to inflammatory conditions may  
653 represent a point of vulnerability to be exploited in cancer treatment with PEMF-based  
654 therapies. PEMF exposure attenuated the proliferation and further slowed the  
655 migration of breast cancer cells in correlation with TRPC1 channel expression, aligning  
656 with evidence that catalytic activation of TRPC6, similarly implicated with proliferation  
657 and inflammatory responses in breast cancer, attenuated MDA-MB-231 breast cancer  
658 cell viability and migratory capacity (45). Both studies further demonstrated reductions  
659 in breast cancer cell invasiveness in response to activation of either TRPC1 (PEMF  
660 exposure) (Fig. 7D) or TRPC6 (Furin inhibition) (45). These findings demonstrate the  
661 value of inducing TRPC-mediated inflammatory responses for attenuating breast  
662 cancer invasiveness and allude to a therapeutic niche for PEMF-based therapies in  
663 cancer treatment.



664 EMT is a multifaceted process whereby transformed cells acquire metastatic  
665 capabilities and resistance to apoptosis (36, 46). Given that small histological grade 1  
666 breast tumors exhibit higher TRPC1 expression than larger grade 3 breast tumors (17),  
667 an elevation in TRPC1 levels may account for the propensity of small grade 1 breast  
668 tumors to undergo EMT (42, 47). In accordance, we demonstrate elevated  
669 expressions of *SLUG*, *SNAIL*, and *VIMENTIN* and downregulated expression of E-  
670 cadherin in TRPC1-overexpressing MCF-7 cells (Fig. 6H), consistent with metastatic  
671 induction (35). Conversely, TRPC1-silencing reduced the expressions of *SLUG* and  
672 *VIMENTIN* and upregulated E-cadherin (Fig. 6K). Elevations of TRPC1 expression are  
673 common in breast cancer (17, 42, 48) and may predispose pre-neoplastic cells  
674 towards EMT by conferring a more proliferative and invasive phenotype, but may not  
675 be required for a systemically metastatic phenotype and possibly selected against by  
676 systemic chemotherapy (*cf* Fig. 5). Indeed, negative selection by DOX against cancer  
677 cells with elevated TRPC1 expression may contribute to the commonly described  
678 chemotherapy paradox, hallmarked by the selection of cells with heightened  
679 chemoresistance (49).

680 Indications of cytotoxic synergies between DOX and TRPC channels exist (40).  
681 Chronic exposure of MCF-7 cells to DOX, attenuated TRPC1 expression (Fig. 5B, C)  
682 resulting in DOX-resistant cells characterized by slowed proliferation (Fig. 5D) and lost  
683 responsiveness to PEMF exposure (Supplementary Figure 4A). On the other hand,  
684 serial passaging of the DOX-resistant MCF-7/ADR cells in the absence of DOX  
685 selective pressure restored proliferative capacity (Fig. 5D) and sensitivity to PEMF  
686 exposure (Supplementary Figure 4A). While DOX treatment (100 nM) was still capable  
687 of attenuating proliferation in both MCF-7/ADR (96 nM DOX) and MCF-7/ADR (0 nM  
688 DOX), they were insensitive to PEMF exposure, suggesting irrecoverable

689 mitochondrial damage. The clinical elaboration of PEMF-based therapies may  
690 ultimately permit the lowering of chemotherapeutic load to help avert collateral  
691 cytotoxicity (3) and paradoxical effects (49) associated with high clinical doses of DOX.

692

## 693 **Conclusion**

694 TRPC1 is a mitohormetic determinant governing cellular inflammatory status and  
695 survival (5, 6, 9), whose elevated expression defines numerous cancers (13, 50). We  
696 demonstrate that the vulnerability of breast cancer to PEMF and DOX therapies is  
697 correlated with TRPC1 expression, conferring a heightened level of specificity for such  
698 TRPC1-characterized cancers (Fig. 8B to 8G). Many cancers exist near the threshold  
699 of metabolic cytotoxicity where even moderate enhancements in cellular metabolism  
700 are sufficient to cause homeostatic disequilibrium. As the TRPC1-PEMF-DOX axis  
701 exerts its actions by elevating oxidative stress, it potentially may be exploited as a  
702 therapeutic paradigm to induce cancer-specific metabolic catastrophe. The presented  
703 pulsing magnetic field paradigm in combination with systemic DOX-based  
704 chemotherapy may hence ultimately prove more selective than conventional therapies  
705 for common cancers characterized by elevated TRPC1 channel expression. Finally,  
706 given the demonstrated specificity of PEMF treatment for TRPC1 expression reported  
707 here and elsewhere (5, 9, 27, 41), in addition with its nominal effects on TRPC1  
708 expression levels, complementation of conventional DOX-based chemotherapy by  
709 localizable PEMF therapy may help avert collateral toxicity (3) and paradoxical effects  
710 (49), by allowing the lowering of systemically-delivered chemotherapeutic dose while  
711 maintaining a unique level of specificity for TRPC1-associated cancers. The values of  
712 these possibilities merit future investigation and clinical validation.

713

714 **List of abbreviations**

715

|                      |                                                        |
|----------------------|--------------------------------------------------------|
| BCA                  | bicinchoninic acid                                     |
| CAM                  | chicken chorioallantoic membrane                       |
| DCH <sub>2</sub> FDA | 2',7'-dichlorodihydrofluorescein diacetate             |
| DMEM                 | Dulbecco's Modified Eagle Medium                       |
| DOX                  | Doxorubicin                                            |
| dsiRNA               | dicer-substrate short interfering RNA                  |
| EMT                  | epithelial-mesenchymal transition                      |
| IC <sub>50</sub>     | half maximal inhibitory concentration                  |
| mT                   | milliTesla                                             |
| NFAT                 | nuclear factor of activated T-cells                    |
| NOD-SCID             | nonobese diabetic/severe combined immunodeficiency     |
| NSG                  | NOD-SCID gamma                                         |
| PDX                  | patient-derived xenograft                              |
| PEMF                 | pulsed electromagnetic field                           |
| PVDF                 | polyvinylidene difluoride                              |
| ROS                  | reactive oxygen species                                |
| RPMI                 | Roswell Park Memorial Institute                        |
| TBH                  | tert-butylhydroperoxide                                |
| TGFβ                 | Transforming Growth Factor beta                        |
| TRPC1                | Transient Receptor Potential Cation Channel C Member 1 |

716

717 **Declarations**

718 ***Ethics approval and consent to participate***

719 Patient samples were collected based on National Healthcare Group Domain Specific  
720 Review Board approval (2014/01088). All animal work was completed under Nanyang  
721 Technological University (NTU) Institutional Animal Care and Use Committee approval  
722 (ARF-SBS/NIE-A0141AZ, A0250AZ, A0324, and A0321).

723

724 ***Consent for publication***

725 Not applicable

726

727 ***Availability of data and materials***

728 The data supporting the conclusions of this article have been given in this article and  
729 its additional files.

730

731 ***Competing interests***

732 AFO is an inventor on patent WO 2019/17863 A1, System, and Method for Applying  
733 Pulsed Electromagnetic Fields as well as is a contributor to QuantumTx Pte. Ltd.,  
734 which elaborates electromagnetic field devices for human use. All other authors  
735 declare no conflicts of interest.

736

737 ***Funding***

738 This work is supported by Lee Kong Chian Foundation, Singapore (N-176-000-045-  
739 001), and the Institute for Health Innovation & Technology, iHealthtech, at the National  
740 University of Singapore.

741

#### 742 ***Authors' contributions***

743 YKT, AFO and NST conceived and designed this study. YKT, KKWC, CHHF and SR  
744 performed the cellular proliferation, ROS, RNA and protein experiments and analyses.  
745 YKT, CHHF, JLYY, and JNY generated and characterized the MCF-7 stable cell line  
746 overexpressing TRPC1. YKT, CHHF, KKWC and SR performed colony-forming  
747 assays, migration and invasion assays. RYJH and APFK established the CAM model.  
748 KKWC, SR, YKT and CHHF performed the MCF-7 cells on CAM model. CWC provided  
749 clinical human breast tumors. YSY and WRT performed the pre-clinical PDX model  
750 using human breast tumors and cell lines. YKT, KKWC, CHHF, SR, NST, AFO  
751 compiled and analyzed the data. YKT and AFO wrote the manuscript and all authors  
752 approved the final manuscript.

753

#### 754 ***Acknowledgments***

755 The authors acknowledge Zac Goh (iHealthtech, National University of Singapore) for  
756 the design of the graphical abstract of the CAM model in Fig. 2 and the animal model  
757 in Fig. 4 We would also like to appreciate the members of the Biologic Currents  
758 Electromagnetic Pulsing Systems Laboratory (BICEPS) for their assistance, without  
759 which this research would not be possible.

760

761

762 **References**

- 763 1. Coughlin SS, Ekwueme DU. Breast cancer as a global health concern. *Cancer*  
764 *Epidemiol.* 2009;33(5):315-8.
- 765 2. DeSantis CE, Ma J, Gaudet MM, Newman LA, Miller KD, Goding Sauer A, et  
766 al. Breast cancer statistics, 2019. *CA Cancer J Clin.* 2019;69(6):438-51.
- 767 3. McGowan JV, Chung R, Maulik A, Piotrowska I, Walker JM, Yellon DM.  
768 Anthracycline Chemotherapy and Cardiotoxicity. *Cardiovasc Drugs Ther.*  
769 2017;31(1):63-75.
- 770 4. Kalyanaraman B, Cheng G, Hardy M, Ouari O, Bennett B, Zielonka J. Teaching  
771 the basics of reactive oxygen species and their relevance to cancer biology:  
772 Mitochondrial reactive oxygen species detection, redox signaling, and targeted  
773 therapies. *Redox Biol.* 2018;15:347-62.
- 774 5. Yap JLY, Tai YK, Frohlich J, Fong CHH, Yin JN, Foo ZL, et al. Ambient and  
775 supplemental magnetic fields promote myogenesis via a TRPC1-mitochondrial axis:  
776 evidence of a magnetic mitohormetic mechanism. *FASEB J.* 2019;33(11):12853-72.
- 777 6. Tai YK, Ng C, Purnamawati K, Yap JLY, Yin JN, Wong C, et al. Magnetic fields  
778 modulate metabolism and gut microbiome in correlation with Pgc-1alpha expression:  
779 Follow-up to an in vitro magnetic mitohormetic study. *FASEB J.* 2020;34(8):11143-67.
- 780 7. Ristow M, Schmeisser K. Mitohormesis: Promoting Health and Lifespan by  
781 Increased Levels of Reactive Oxygen Species (ROS). *Dose Response.*  
782 2014;12(2):288-341.
- 783 8. Crocetti S, Beyer C, Schade G, Egli M, Frohlich J, Franco-Obregon A. Low  
784 intensity and frequency pulsed electromagnetic fields selectively impair breast cancer  
785 cell viability. *PLoS One.* 2013;8(9):e72944.
- 786 9. Kurth F, Tai YK, Parate D, van Oostrum M, Schmid YRF, Toh SJ, et al. Cell-  
787 Derived Vesicles as TRPC1 Channel Delivery Systems for the Recovery of Cellular  
788 Respiratory and Proliferative Capacities. *Adv Biosyst.* 2020;4(11):e2000146.
- 789 10. Boyman L, Karbowski M, Lederer WJ. Regulation of Mitochondrial ATP  
790 Production: Ca(2+) Signaling and Quality Control. *Trends Mol Med.* 2020;26(1):21-39.
- 791 11. Gervasio OL, Whitehead NP, Yeung EW, Phillips WD, Allen DG. TRPC1 binds  
792 to caveolin-3 and is regulated by Src kinase - role in Duchenne muscular dystrophy. *J*  
793 *Cell Sci.* 2008;121(Pt 13):2246-55.
- 794 12. Yang D, Kim J. Emerging role of transient receptor potential (TRP) channels in  
795 cancer progression. *BMB Rep.* 2020;53(3):125-32.
- 796 13. Chinigo G, Fiorio Pla A, Gkika D. TRP Channels and Small GTPases Interplay  
797 in the Main Hallmarks of Metastatic Cancer. *Front Pharmacol.* 2020;11:581455.
- 798 14. Hwang JA, Hwang MK, Jang Y, Lee EJ, Kim JE, Oh MH, et al. 20-O-beta-d-  
799 glucopyranosyl-20(S)-protopanaxadiol, a metabolite of ginseng, inhibits colon cancer  
800 growth by targeting TRPC channel-mediated calcium influx. *J Nutr Biochem.*  
801 2013;24(6):1096-104.
- 802 15. Selli C, Erac Y, Tosun M. Simultaneous measurement of cytosolic and  
803 mitochondrial calcium levels: observations in TRPC1-silenced hepatocellular  
804 carcinoma cells. *J Pharmacol Toxicol Methods.* 2015;72:29-34.
- 805 16. Jang Y, Lee Y, Kim SM, Yang YD, Jung J, Oh U. Quantitative analysis of TRP  
806 channel genes in mouse organs. *Arch Pharm Res.* 2012;35(10):1823-30.
- 807 17. Dhennin-Duthille I, Gautier M, Faouzi M, Guilbert A, Brevet M, Vaudry D, et al.  
808 High expression of transient receptor potential channels in human breast cancer

- 809 epithelial cells and tissues: correlation with pathological parameters. *Cell Physiol*  
810 *Biochem.* 2011;28(5):813-22.
- 811 18. Kim YA, Cho DY, Przytycka TM. Understanding Genotype-Phenotype Effects  
812 in Cancer via Network Approaches. *PLoS Comput Biol.* 2016;12(3):e1004747.
- 813 19. Liu X, Zou J, Su J, Lu Y, Zhang J, Li L, et al. Downregulation of transient  
814 receptor potential cation channel, subfamily C, member 1 contributes to drug  
815 resistance and high histological grade in ovarian cancer. *Int J Oncol.* 2016;48(1):243-  
816 52.
- 817 20. Yang B, Wolfenson H, Chung VY, Nakazawa N, Liu S, Hu J, et al. Stopping  
818 transformed cancer cell growth by rigidity sensing. *Nat Mater.* 2020;19(2):239-50.
- 819 21. Ito R, Takahashi T, Katano I, Ito M. Current advances in humanized mouse  
820 models. *Cell Mol Immunol.* 2012;9(3):208-14.
- 821 22. Franken NA, Rodermond HM, Stap J, Haveman J, van Bree C. Clonogenic  
822 assay of cells in vitro. *Nat Protoc.* 2006;1(5):2315-9.
- 823 23. Tsou SH, Chen TM, Hsiao HT, Chen YH. A critical dose of doxorubicin is  
824 required to alter the gene expression profiles in MCF-7 cells acquiring multidrug  
825 resistance. *PLoS One.* 2015;10(1):e0116747.
- 826 24. Buckner CA, Buckner AL, Koren SA, Persinger MA, Lafrenie RM. Exposure to  
827 a specific time-varying electromagnetic field inhibits cell proliferation via cAMP and  
828 ERK signaling in cancer cells. *Bioelectromagnetics.* 2018;39(3):217-30.
- 829 25. Osera C, Amadio M, Falone S, Fassina L, Magenes G, Amicarelli F, et al. Pre-  
830 exposure of neuroblastoma cell line to pulsed electromagnetic field prevents H<sub>2</sub>O<sub>2</sub>-  
831 induced ROS production by increasing MnSOD activity. *Bioelectromagnetics.*  
832 2015;36(3):219-32.
- 833 26. Celik C, Franco-Obregon A, Lee EH, Hui JH, Yang Z. Directionalities of  
834 magnetic fields and topographic scaffolds synergise to enhance MSC chondrogenesis.  
835 *Acta Biomater.* 2021;119:169-83.
- 836 27. Madanagopal TT, Tai YK, Lim SH, Fong CH, Cao T, Rosa V, et al. Pulsed  
837 electromagnetic fields synergize with graphene to enhance dental pulp stem cell-  
838 derived neurogenesis by selectively targeting TRPC1 channels. *Eur Cell Mater.*  
839 2021;41:216-32.
- 840 28. Tarpey MD, Amorese AJ, Balestrieri NP, Fisher-Wellman KH, Spangenburg EE.  
841 Doxorubicin causes lesions in the electron transport system of skeletal muscle  
842 mitochondria that are associated with a loss of contractile function. *J Biol Chem.*  
843 2019;294(51):19709-22.
- 844 29. Monteith GR, Prevarskaya N, Roberts-Thomson SJ. The calcium-cancer  
845 signalling nexus. *Nat Rev Cancer.* 2017;17(6):367-80.
- 846 30. Villalobos C, Hernandez-Morales M, Gutierrez LG, Nunez L. TRPC1 and  
847 ORAI1 channels in colon cancer. *Cell Calcium.* 2019;81:59-66.
- 848 31. Denard B, Lee C, Ye J. Doxorubicin blocks proliferation of cancer cells through  
849 proteolytic activation of CREB3L1. *Elife.* 2012;1:e00090.
- 850 32. Nagaraja GM, Othman M, Fox BP, Alsaber R, Pellegrino CM, Zeng Y, et al.  
851 Gene expression signatures and biomarkers of noninvasive and invasive breast  
852 cancer cells: comprehensive profiles by representational difference analysis,  
853 microarrays and proteomics. *Oncogene.* 2006;25(16):2328-38.
- 854 33. Liu YL, Chou CK, Kim M, Vasisht R, Kuo YA, Ang P, et al. Assessing metastatic  
855 potential of breast cancer cells based on EGFR dynamics. *Sci Rep.* 2019;9(1):3395.
- 856 34. Pigozzi D, Ducret T, Tajeddine N, Gala JL, Tombal B, Gailly P. Calcium store  
857 contents control the expression of TRPC1, TRPC3 and TRPV6 proteins in LNCaP  
858 prostate cancer cell line. *Cell Calcium.* 2006;39(5):401-15.

- 859 35. Vuoriluoto K, Haugen H, Kiviluoto S, Mpindi JP, Nevo J, Gjerdrum C, et al.  
860 Vimentin regulates EMT induction by Slug and oncogenic H-Ras and migration by  
861 governing Axl expression in breast cancer. *Oncogene*. 2011;30(12):1436-48.
- 862 36. Thiery JP, Acloque H, Huang RY, Nieto MA. Epithelial-mesenchymal transitions  
863 in development and disease. *Cell*. 2009;139(5):871-90.
- 864 37. Tavakolian S, Goudarzi H, Faghiehloo E. E-cadherin, Snail, ZEB-1, DNMT1,  
865 DNMT3A and DNMT3B expression in normal and breast cancer tissues. *Acta Biochim*  
866 *Pol*. 2019;66(4):409-14.
- 867 38. Na TY, Schecterson L, Mendonsa AM, Gumbiner BM. The functional activity of  
868 E-cadherin controls tumor cell metastasis at multiple steps. *Proc Natl Acad Sci U S A*.  
869 2020;117(11):5931-7.
- 870 39. Canel M, Serrels A, Frame MC, Brunton VG. E-cadherin-integrin crosstalk in  
871 cancer invasion and metastasis. *J Cell Sci*. 2013;126(Pt 2):393-401.
- 872 40. Chen RC, Sun GB, Ye JX, Wang J, Zhang MD, Sun XB. Salvianolic acid B  
873 attenuates doxorubicin-induced ER stress by inhibiting TRPC3 and TRPC6 mediated  
874 Ca(2+) overload in rat cardiomyocytes. *Toxicol Lett*. 2017;276:21-30.
- 875 41. Parate D, Franco-Obregon A, Frohlich J, Beyer C, Abbas AA, Kamarul T, et al.  
876 Enhancement of mesenchymal stem cell chondrogenesis with short-term low intensity  
877 pulsed electromagnetic fields. *Sci Rep*. 2017;7(1):9421.
- 878 42. Azimi I, Milevskiy MJG, Kaemmerer E, Turner D, Yapa K, Brown MA, et al.  
879 TRPC1 is a differential regulator of hypoxia-mediated events and Akt signalling in  
880 PTEN-deficient breast cancer cells. *J Cell Sci*. 2017;130(14):2292-305.
- 881 43. Zhang L, Dong L, Tang Y, Li M, Zhang M. MiR-146b protects against the  
882 inflammation injury in pediatric pneumonia through MyD88/NF-kappaB signaling  
883 pathway. *Infect Dis (Lond)*. 2020;52(1):23-32.
- 884 44. Yan M, Yang X, Shen R, Wu C, Wang H, Ye Q, et al. miR-146b promotes cell  
885 proliferation and increases chemosensitivity, but attenuates cell migration and  
886 invasion via FBXL10 in ovarian cancer. *Cell Death Dis*. 2018;9(11):1123.
- 887 45. López JJS, G.; Cantonero, C.; Soulet, F.; Descarpentrie, J.; Smani, T.; Badiola,  
888 I.; Pernot, S.; Evrard, S.; Rosado, J.A.; Khatib, A.-M. Furin Prodomain ppFurin  
889 Enhances Ca<sup>2+</sup> Entry Through Orai and TRPC6 Channels' Activation in Breast  
890 Cancer Cells. *Cancers (Basel)*. 2021;13(7):1670.
- 891 46. Iwatsuki M, Mimori K, Yokobori T, Ishi H, Beppu T, Nakamori S, et al. Epithelial-  
892 mesenchymal transition in cancer development and its clinical significance. *Cancer*  
893 *Sci*. 2010;101(2):293-9.
- 894 47. Savci-Heijink CD, Halfwerk H, Hooijer GKJ, Koster J, Horlings HM, Meijer SL,  
895 et al. Epithelial-to-mesenchymal transition status of primary breast carcinomas and its  
896 correlation with metastatic behavior. *Breast Cancer Res Treat*. 2019;174(3):649-59.
- 897 48. Zhang LY, Zhang YQ, Zeng YZ, Zhu JL, Chen H, Wei XL, et al. TRPC1 inhibits  
898 the proliferation and migration of estrogen receptor-positive Breast cancer and gives  
899 a better prognosis by inhibiting the PI3K/AKT pathway. *Breast Cancer Res Treat*.  
900 2020;182(1):21-33.
- 901 49. D'Alterio C, Scala S, Sozzi G, Roz L, Bertolini G. Paradoxical effects of  
902 chemotherapy on tumor relapse and metastasis promotion. *Semin Cancer Biol*.  
903 2020;60:351-61.
- 904 50. Elzamzamy OM, Penner R, Hazlehurst LA. The Role of TRPC1 in Modulating  
905 Cancer Progression. *Cells*. 2020;9(2).

906

907



908 **Supplementary Figures.**

909

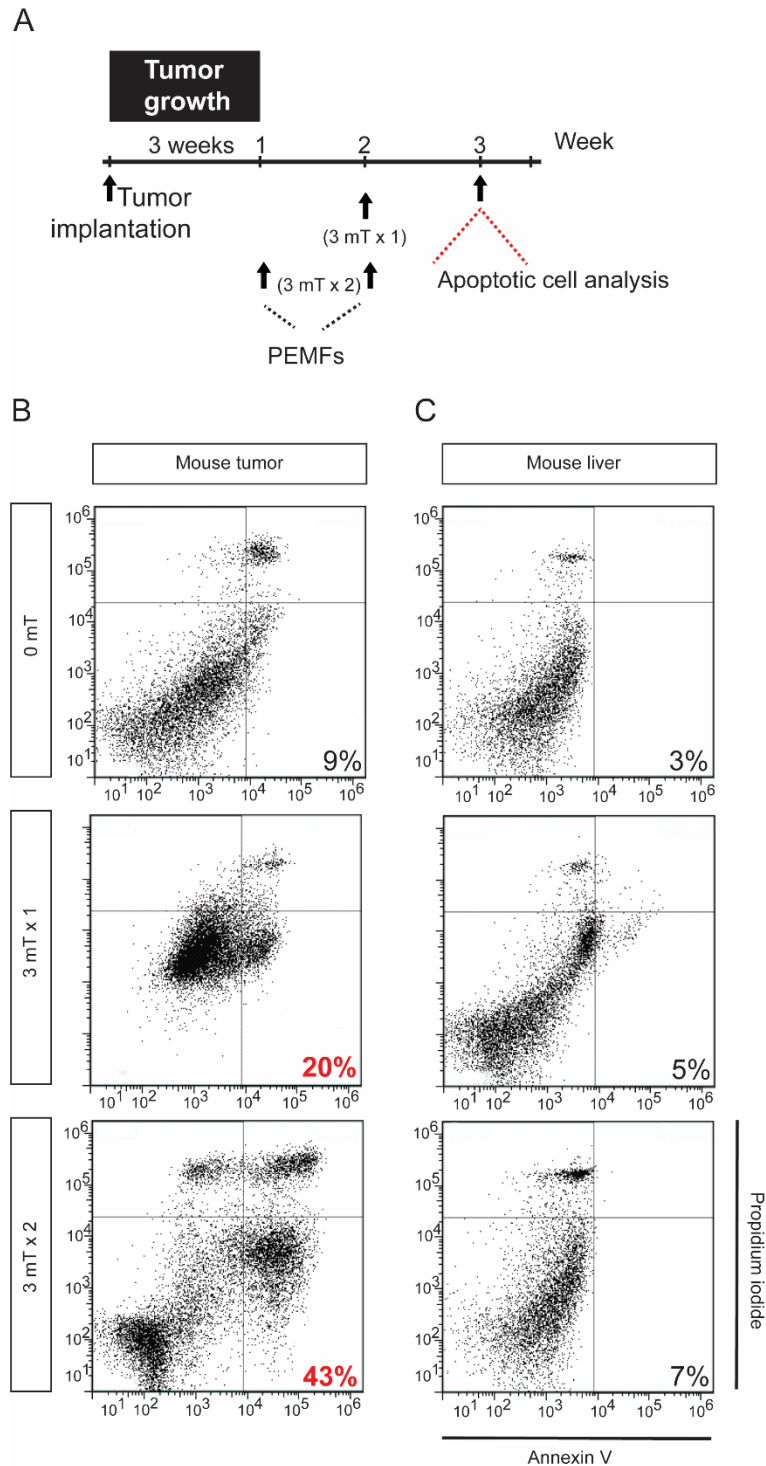

910

911 **Supplementary Figure 1. PEMFs inhibit MDA-MB-231 tumor growth without**  
912 **affecting liver *in vivo*.** **A)** Schematic of PEMF exposure of NSG mice implanted with  
913 MDA-MB-231 tumors. Implanted tumors were allowed to grow for 3 weeks before the  
914 initiation of PEMF exposure once (3 mT x 1; 1 h, once a week) or twice (3 mT x 2;  
915 1 h once a week for 2 weeks). Flow cytometric analysis was performed 1 week after the  
916 last PEMF exposure. Representative scatter dot-plots of **B)** MDA-MB-231 xenografts

917 and **C)** mouse livers showing cell population of dissociated tumors sorted based on  
 918 annexin and propidium iodide staining. The percentages represent the total early and  
 919 late apoptotic cells.

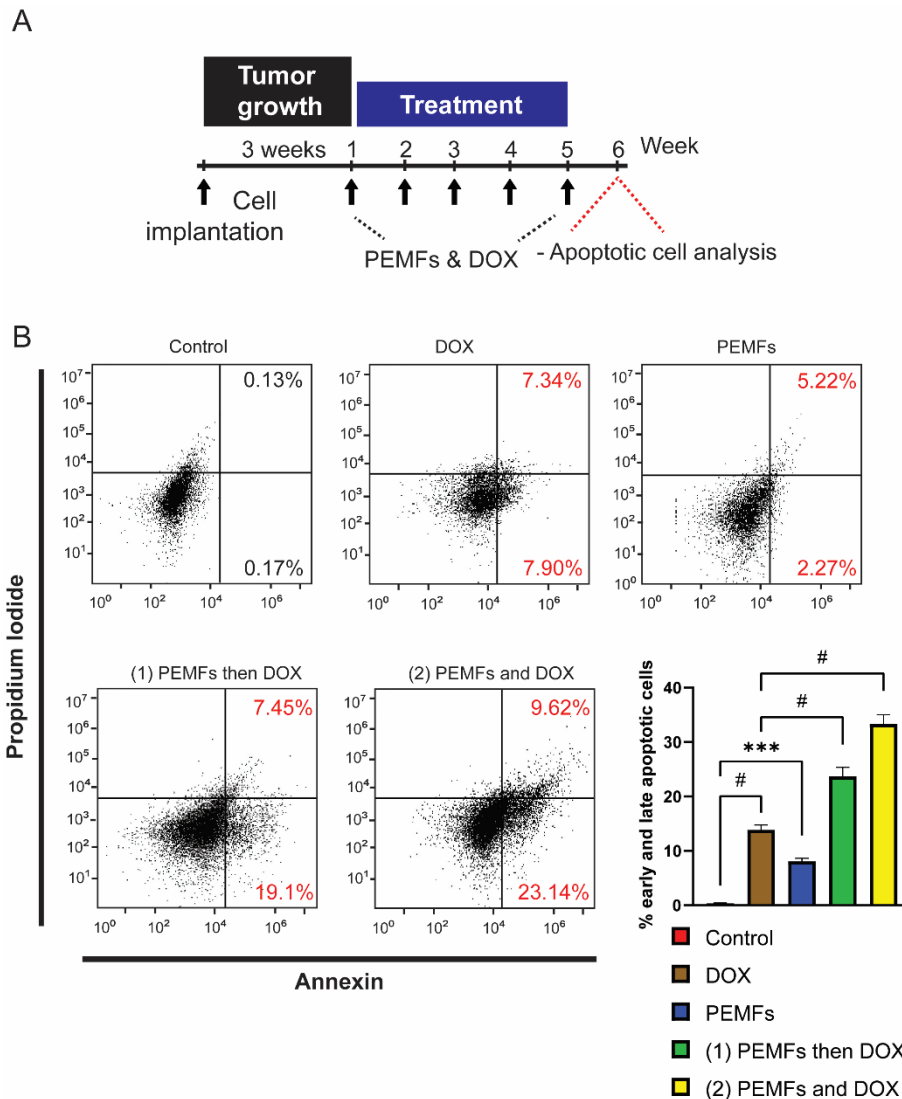

920

921 **Supplementary Figure 2. PEMFs synergize with doxorubicin to inhibit MCF-7**  
 922 **tumor growth *in vivo*.** **A)** Schematic of weekly PEMF and DOX exposures on MCF-  
 923 7 xenograft in mice. Implanted cells were allowed to grow for 3 weeks before the  
 924 initiation of DOX and/or PEMF treatment. Apoptotic cell determination was performed  
 925 at the end of the study. **B)** Representative scatter dot-plots showing cell population of  
 926 dissociated tumors sorted based on annexin and propidium iodide staining. Bar charts  
 927 represent pooled data of early and late apoptotic cell percentages analyzed using flow  
 928 cytometry. N = 6 mice, with \* $p < 0.05$ , \*\* $p < 0.01$ , and # $p < 0.0001$ . The error bars are  
 929 expressed as the standard error of the mean.

930

A

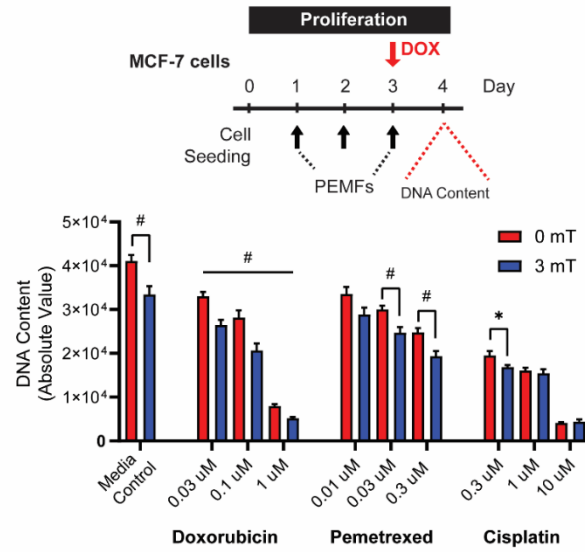

B

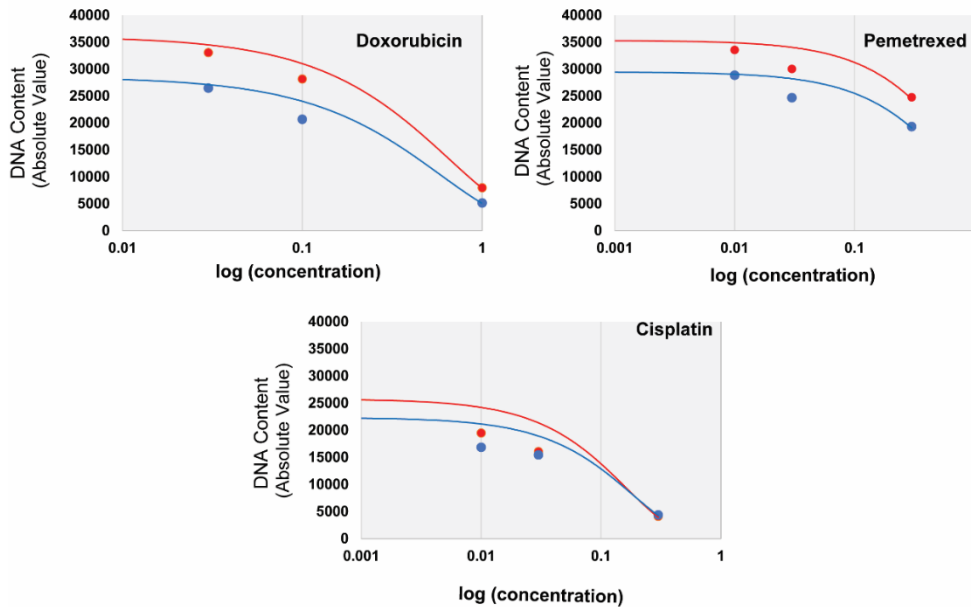

931

932 **Supplementary Figure 3. A)** Chemo-sensitivity of MCF-7 cancer cells to Pemetrexed  
 933 and Cisplatin in combination with PEMF in comparison to DOX. Cells were seeded in  
 934 96-well and exposed to 3 mT PEMF for 1 h per day for 3 days. Chemotherapeutic  
 935 drugs were added (red arrow) on the final day of PEMF before the analysis of DNA  
 936 content 24 h later. The corresponding bar charts show the absolute DNA content of  
 937 cells in response to increasing doses of chemotherapeutic agents with or without  
 938 PEMFs. **B)** Representation of a dose-response curve of the same data in (A), treated  
 939 with DOX, Pemetrexed, and Cisplatin. The X-axis represents log (concentration) and  
 940 the y-axis represents the absolute intensity of DNA content. Statistical analysis was  
 941 performed using multiple unpaired *t*-tests, comparing between 0 mT and 3 mT within  
 942 each concentration. All experiments were of at least 3 independent experiments with  
 943 \**p* < 0.05, and #*p* < 0.0001. The error bars are expressed as the standard error of the  
 944 mean.

945

A

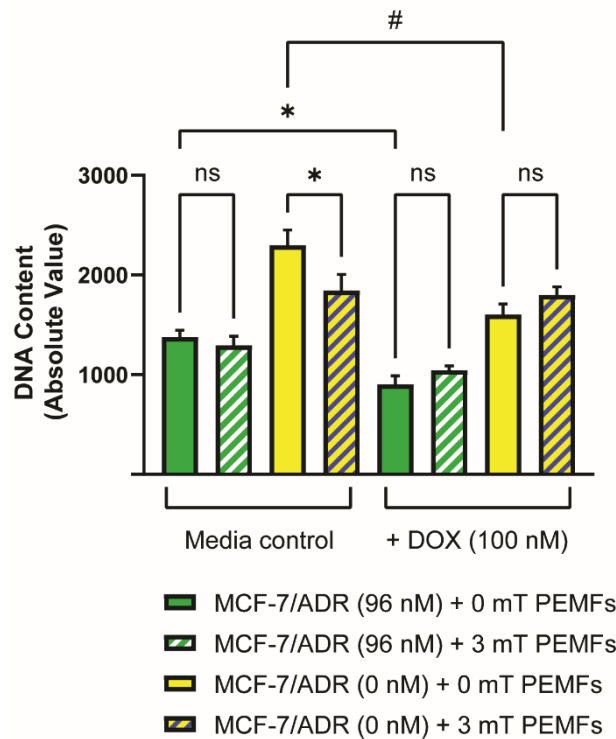

946

947 **Supplementary Figure 4.** Recovery of PEMF cytotoxicity upon removal of selective  
948 pressure from DOX and reinstatement of TRPC1 expression. **A)** Cell proliferation  
949 assay using Cyquant DNA content analysis on MCF-7/ADR cell lines, in combination  
950 with DOX (100 nM) and PEMF exposure. MCF-7/ADR (96 nM) cells were maintained  
951 in 96 nM DOX while MCF-7/ADR (0 nM) were serially passaged in the absence of  
952 DOX. Cells were exposed to 3 mT PEMFs for 1 h per day for 3 days. 100 nM DOX  
953 was administered 1 h before the final PEMF exposure. Cyquant analysis was  
954 performed 24 h after the final PEMF exposure. Statistical analysis was performed  
955 using one-way ANOVA with Sidak's multiple comparison test. All experiments were of  
956 at least 3 independent experiments with  $*p < 0.05$ , and  $\#p < 0.0001$ . The error bars are  
957 expressed as the standard error of the mean.

958

## 959 **Supplementary Information**

960

### 961 **Material and methods**

962

#### 963 **Cell culture and pharmacology**

964 MCF-7 (HTB-22™) cells were acquired from American Type Culture Collection (ATCC)

965 and maintained in RPMI (Gibco) supplemented with 10% FBS (Hyclone) and

966 maintained in a humidified incubator at 37°C in 5% CO<sub>2</sub>. MDA-MB-213 and MCF10A  
967 were acquired from Dr. Andrew Tan's laboratory. MDA-MB-231 cells were maintained  
968 in DMEM (Gibco) and 10% FBS. MCF10A cells were maintained in growth media  
969 containing DMEM/F12 (Gibco) supplemented with 5% horse serum (Hyclone), 20  
970 ng/ml EGF (Peprotech), 0.5 mg/ml Hydrocortisone (Sigma), 100 ng/ml cholera toxin  
971 (Sigma) and 10 ug/ml insulin (Sigma). Cells were trypsinized and passaged every 3  
972 days using TrypLE Express reagent (Gibco). MCF-7/ADR cells resistant to 96 nM DOX  
973 were generated using a progressive incubation of cells in low 0.3 nM up to 96 nM DOX  
974 over 4 months. The concentration of DOX was doubled weekly upon cell reseeded.  
975 DOX Doxorubicin hydrochloride (DOX) (Abcam, ab120629) was reconstituted in  
976 DMSO to make a stock concentration of 25 mM and stored at -80°C. Subsequent  
977 dilutions of DOX were made in distilled water to keep DMSO concentration below  
978 0.01%. For the characterization of TRPC1 protein levels, PC3 and LNCaP cells were  
979 maintained in RPMI media containing 10% FBS. No cell culture antibiotics were used  
980 throughout the experiments.

981

## 982 **Cell count and DNA content analysis**

983 For cell enumeration using trypan blue exclusion assay, MCF-7, MDA-MB-231, or  
984 MCF10A cells were seeded at 6000 cells/cm<sup>2</sup> per well of a 6-well plate. For MCF10A  
985 cells, they were plated in growth media without EGF. Cell counting was performed  
986 using 3 wells of a 6-well plate for technical replication. For DNA content analysis using  
987 Cyquant cell proliferation assay (Invitrogen), cells were seeded at 4000 cells per well  
988 and performed with 8 technical replicates in a 96-well plate. Seeded cells were left for

989 24 h before treatment with DOX or exposed to PEMFs. Cyquant stained DNA was  
990 measured using at 480/520 nm using Cytation 5 microplate reader (BIOTEK).

991

## 992 **Clonogenic assay and quantification of colonies**

993 *In vitro* clonogenic assay was performed using crystal violet staining (22). Briefly,  
994 MCF-7 cells were seeded either at 100 or 1000 cells per well of a 6-well plate. The  
995 cells were treated with DOX on Day 1, 4, and 7 in RPMI supplemented with 10% FBS.  
996 3 mT PEMFs stimulation was administered for 1 h from Day 1 to Day 10. On Day 11,  
997 the cells were rinsed in PBS and stained with crystal violet stain consisting of 0.5%  
998 crystal violet and 25% glutaraldehyde (Sigma Aldrich) in distilled water for 3 h. Stained  
999 colonies were rinsed with 2 changes of tap water and left to dry. Images of the colonies  
1000 were taken using Chemidoc Imaging System (BIORAD) under the Coomassie Blue  
1001 Stain filter setting. The number of colonies and colony size per well was estimated  
1002 using the ImageJ Analyze particle option using 3 to 3500-pixel unit with a circularity of  
1003 0.2 to 1. The mean survival factor was determined as the number of surviving cells  
1004 over the number of cells plated and normalized to the survival factor of the control  
1005 group expressed as fold change. The colony size relative frequency was determined  
1006 by binning colonies into 10 bins, according to their relative size from the smallest (1)  
1007 to the largest (10) colonies after normalizing to the total number of cells.

1008

## 1009 **Reactive oxygen species analysis using DCH<sub>2</sub>FDA**

1010 Cells were seeded in 96-well clear bottom black well (Costar) at a density of 10,000  
1011 cells per well at 8 replicates per condition and left to settle for 24 h before commencing  
1012 the experiment. Cells were rinsed with warm phenol-free and serum-free (PFSF) RPMI

1013 (GIBCO) and incubated with PFSF RPMI containing 10  $\mu$ M DCH<sub>2</sub>FDA (Invitrogen) for  
1014 30 min in a standard tissue culture incubator. The dye was then rinsed out using warm  
1015 PFSF RPMI and treated with tert-Butyl hydroperoxide (TBH, 1 mM; Sigma Aldrich) or  
1016 50  $\mu$ M DOX (Abcam) in PFSF RPMI. Cells were immediately exposed to 10 min of 0  
1017 mT or 3 mT PEMFs exposure before proceeding to ROS determination using a  
1018 Cytation 5 microplate reader (BIOTEK) at Ex/EM: 492/520 nm for 20 min with the  
1019 temperature set at 37°C.

1020

### 1021 **Western Analysis**

1022 Cell lysates were prepared in ice-cold radioimmunoprecipitation assay (RIPA) buffer  
1023 containing 150 mM NaCl, 1% Triton X-100, 0.5% sodium deoxycholate, 0.1% SDS  
1024 and 50 mM Tris (pH 8.0) supplemented with protease and phosphatase inhibitors  
1025 (PhosphoSTOP, Roche). Cells were lysed for 20 min and centrifuged for 10 min at  
1026 13,500 rpm. The protein concentration of the soluble fractions was determined using  
1027 a BCA reagent (Thermo Fisher Scientific). 25 - 50  $\mu$ g of total protein was resolved  
1028 using 10% or 12% denaturing polyacrylamide gel electrophoresis and transferred to  
1029 PVDF membrane (Immobilon-P, PVDF). Proteins on PVDF membranes were blocked  
1030 using 5% low-fat milk in TBST containing 0.1% Tween-20 and incubated with the  
1031 primary antibody in SuperBlock (TBS, Thermo Fisher Scientific) overnight at 4 °C. The  
1032 primary antibodies used were: TRPC1 (1:300; Santa Cruz), Cyclin D1 (CD1, 1:300;  
1033 Santa Cruz), Caspase 3 (1:300; Santa Cruz), GFP (1:1000; Proteintech),  $\beta$ -actin  
1034 (1:10,000; Proteintech),  $\alpha$ -tubulin (1:5000; Proteintech). The membranes were  
1035 washed in TBST. Anti-rabbit or anti-mouse antibody conjugated to horseradish  
1036 peroxidase (HRP) were diluted (1:3000, Thermo Fisher Scientific) in 5% milk in TBST

1037 and were incubated with the membranes for 1 h at room temperature. The membranes  
1038 were incubated in WestPico or WestFemto chemiluminescent substrate (Thermo  
1039 Fisher Scientific), detected and analyzed using LI-COR Image Studio.

1040

#### 1041 **Laser confocal imaging**

1042 For the visualization of GFP and Vimentin abundance in TRPC1 overexpressing MCF-  
1043 7 cells, the cells were seeded onto coverslips at a density of 100,000 cells per well of  
1044 a 6-well plate (NUNC). 24 h post-seeding, the cells were rinsed with PBS and fixed in  
1045 4% paraformaldehyde for 20 min. For the direct visualization of the expression of GFP  
1046 in vector-only and MCF-7/TRPC1 cells, the cells on coverslips were mounted onto  
1047 glass slides using ProLong Gold Antifade Mountant (Thermo Fisher Scientific). The  
1048 cells were then analyzed using the Olympus FV1000 confocal laser scanning  
1049 microscope. For the visualization of *VIMENTIN*, the cells were permeabilized with 0.1%  
1050 Triton in PBS for 10 mins after fixation. The cells were then blocked in SuperBlock  
1051 TBS (Thermo Fisher Scientific) followed by Vimentin antibody (Santa Cruz, 1:100)  
1052 incubation overnight, followed by secondary Alexa Fluor 594 antibody (1:500, Thermo  
1053 Fisher Scientific) for 1 h at room temperature. Washes between steps were done with  
1054 PBS with 0.1% Tween (Sigma Aldrich). Nuclei of cells were co-stained with DAPI  
1055 (Sigma Aldrich) for 10 min. Cells were finally mounted and visualized using a laser  
1056 confocal microscope. For the quantitative analysis of Vimentin abundance, the total  
1057 absolute intensity per view was normalized to the number of nuclei to yield a mean  
1058 protein intensity per cell. The average of the mean protein intensity per cell (at least  
1059 10 cells per view) from multiple replicates were used to compute and compare the  
1060 abundance of Vimentin protein between vector-only and MCF-7/TRPC1 cells.



1061

1062 **Real-time qPCR and TRPC1 silencing**

1063 Quantitative reverse-transcription polymerase chain reaction (RT-qPCR) was carried  
1064 out using the SYBR green-based detection workflow. Briefly, total RNA was harvested  
1065 from MCF-7 cells using Trizol reagent (Thermo Fisher Scientific) and 0.5 ug of RNA  
1066 was reverse transcribed to cDNA using iScript cDNA Synthesis kit (Bio-Rad).  
1067 Quantification of gene transcript expression was performed using SSoAdvanced  
1068 Universal SYBR Green (Bio-Rad) on the CFZ Touch Real-Time PCR Detection  
1069 System (Bio-Rad). Relative transcript expression was determined using the  $2^{-\Delta\Delta Ct}$   
1070 method, normalized to  $\beta$ -actin transcript levels. The qPCR primers used were: *TRPC1*,  
1071 F: 5'-AAG CTT TTC TTG CTG GCG TG, R: 5'-ATC TGC AGA CTG ACA ACC GT;  
1072 *SNAIL*, F: 5'-CGA GTG GTT CTT CTG CGC TA, R: 5'-CTG CTG GAA GGT AAA CTC  
1073 TGG A; *SLUG*, F: 5'-TAG AAC TCA CAC GGG GGA GAA G, R: 5'-ATT GCG TCA  
1074 CTC AGT GTG CT; *VIMENTIN* F: 5'-AAG GCG AGG AGA GCA GGA TT, R: 5'- AGG  
1075 TCA TCG TGA TGC TGA GA; and  $\beta$ -actin, 5'-AGA AGA TGA CCC AGA TCA TGT  
1076 TTG A, R: 5'-AGC ACA GCC TGG ATA GCA AC.

1077 For TRPC1 silencing in MCF-7 cells, two pre-designed dicer-substrate short  
1078 interfering RNAs (dsiRNA, IDT) were used to knock down the expression of TRPC1.  
1079 Both dsiRNAs targeted the coding-sequence of TRPC1 (NM\_001251845).  
1080 Transfection of dsiRNA was performed using Lipofectamine 3000 reagent (Invitrogen)  
1081 as per manufacturer's protocol. TRPC1-silenced cells were validated using qPCR 48  
1082 h post dsiRNA transfection using primers against *TPRC1*, *SNAIL*, *SLUG* and  
1083 *VIMENTIN* as indicated above, relative to cells transfected with scramble dsiRNA.

1084

1085 **Migration Assay**

1086 MCF-7 cells at a density of 30,000 cells in 120 ul RPMI supplemented with 10% FBS  
1087 were seeded into each gap of a 4-well 3.5 mm culture dish insert (ibidi). The cells were  
1088 left to adhere for 24 h before the removal of the insert and the addition of RPMI media  
1089 containing 10% FBS to a total volume of 2 ml per dish. Closure of the gaps was  
1090 captured using light microscopy on all four limbs of the insert, taken every 24 h. The  
1091 average of 16 gap distances was considered from the 4 limbs with 4 readings arising  
1092 from each limb. The images of the gap distances were analyzed using ImageJ.

1093

1094 **Invasion Assay**

1095 Invasion assay was performed using the CytoSelect 24-well Cell Invasion Assay kit  
1096 (Cell Biolabs, Inc.) according to the manufacturer's protocol. Briefly, 300,000 cells  
1097 were seeded in the cell culture insert after the rehydration of the basal membrane in  
1098 FBS-free RPMI media. The lower well of the invasion plate was filled with RPMI media  
1099 supplemented with 10% to promote the invasion of cells through the basal membrane.  
1100 20 ng/ml TGF $\beta$  was added to selected conditions in the cell culture insert to stimulate  
1101 cell invasion. The setup was incubated for 48 h in a standard tissue culture incubator  
1102 before the extraction and staining of the invaded cells from the basal membrane. The  
1103 lysates from the extracted cells were analyzed at OD 560 using Cytation 5 microplate  
1104 reader (BIOTEK).

1105

1106 **Generation of plasmid and stable cell line**

1107 GFP-TRPC1 plasmid was generated by PCR amplification of full-length human  
1108 TRPC1 cDNA (Accession: NM\_001251845.2; 2382 base pairs) and directionally  
1109 subcloned into the pEGFP-C1 vector. Transfection of plasmids in MCF-7 cells was  
1110 carried out using Lipofectamine 3000 reagent (Invitrogen). 48 h after plasmid  
1111 transfection, stable cells were selected in RPMI containing 750 ug/ml Geneticin  
1112 (Invitrogen), 10% FBS, and 1% Pen/Strep (Gibco) in 5% CO<sub>2</sub> at 37 °C. GFP vector  
1113 and GFP-TRPC1 cells were enriched for GFP positive cells using Beckman Coulter  
1114 Moflo Astrios cell sorter. Stable cells were subsequently maintained in complete  
1115 RPMI media containing 500 ug/ml Geneticin. The overexpression of GFP-TRPC1 in  
1116 the stable cells was characterized using qPCR, immunofluorescence, and western  
1117 analysis. GFP stable cells are referred to as vector-only cells while GFP-TRPC1  
1118 overexpression stable cells are referred to as MCF-7/TRPC1 cells in the manuscript.

1119

### 1120 **Apoptotic assay**

1121 For apoptotic cell determination, the tumors were dissociated to single cells using the  
1122 MACS Tumor Dissociation Kit in combination with the gentleMACS Dissociator  
1123 (Miltenyi Biotec) as according to the manufacturer's protocol. After dissociation, the  
1124 cells were filtered through a 30 um MACS SmartStrainer. Cells were pelleted from the  
1125 filtrate at 300 g x 7 min and resuspended in 400 ul Binding Buffer. The cells were  
1126 incubated with Annexin V FITC and Propidium Iodide (Sigma Aldrich) for 15 min in the  
1127 dark at room temperature. After incubation, the cells were pelleted and resuspended  
1128 in 100 ul Binding Buffer for analysis by flow cytometry using BD Accuri C6 cytometer  
1129 (BD Biosciences, CA, USA).

### 1130 **Statistical analysis**

1131 All statistics were carried out using GraphPad Prism (Version 8) software. One-way  
1132 analysis of variance (ANOVA) was used to compare the values between two or more  
1133 groups supported by multiple comparisons. This was followed by Bonferroni's posthoc  
1134 test. For the comparison between two independent samples, the Student's *t*-test was  
1135 performed.

1136
